# Supplementary material for: Comparison of antipsychotic dose equivalents for acute bipolar mania and schizophrenia
Source: HighWire-hosted journal article supplement (doi:10.1136/bmjment-2022-300546), 2023-02-01

eFigure 1. PRISMA 2020 flow diagram for new systematic reviews which included searches of databases and registers only.

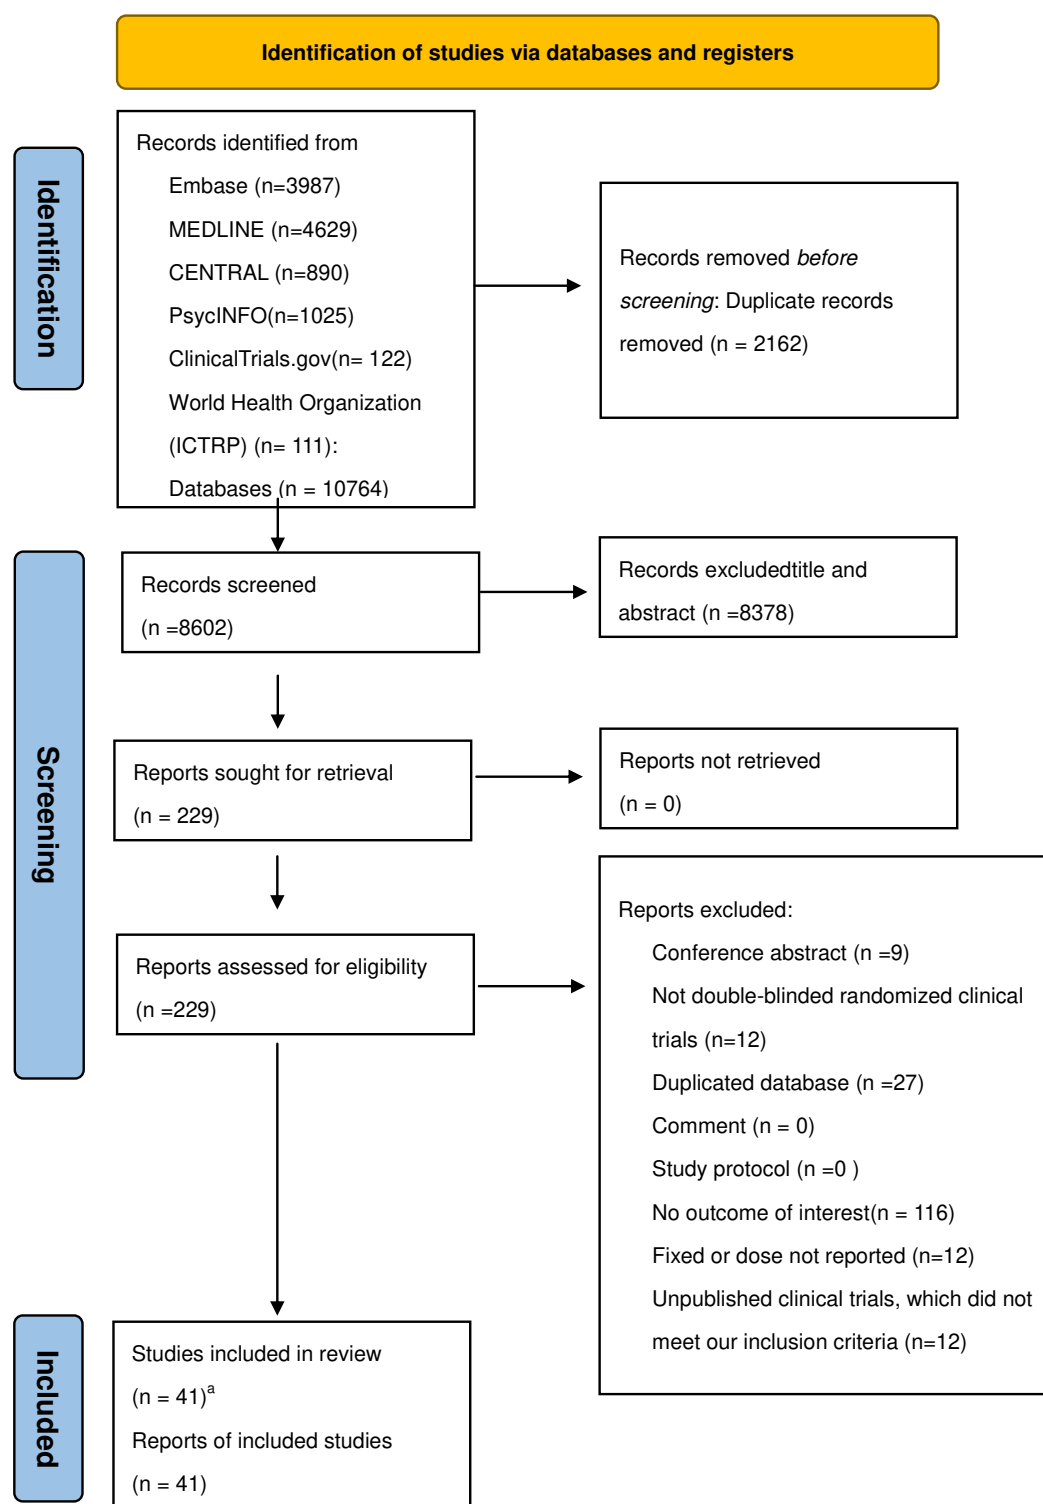

From: Page MJ, McKenzie JE, Bossuyt PM, Boutron I, Hoffmann TC, Mulrow CD, et al. The PRISMA 2020 statement: an updated guideline for reporting systematic reviews. *BMJ* 2021;372:n71. doi: 10.1136/bmj.n71

<sup>a</sup>. There are 42 randomized-controlled trials in these 41 studies.

eFigure2. Risk of bias graph across the included 41 studies

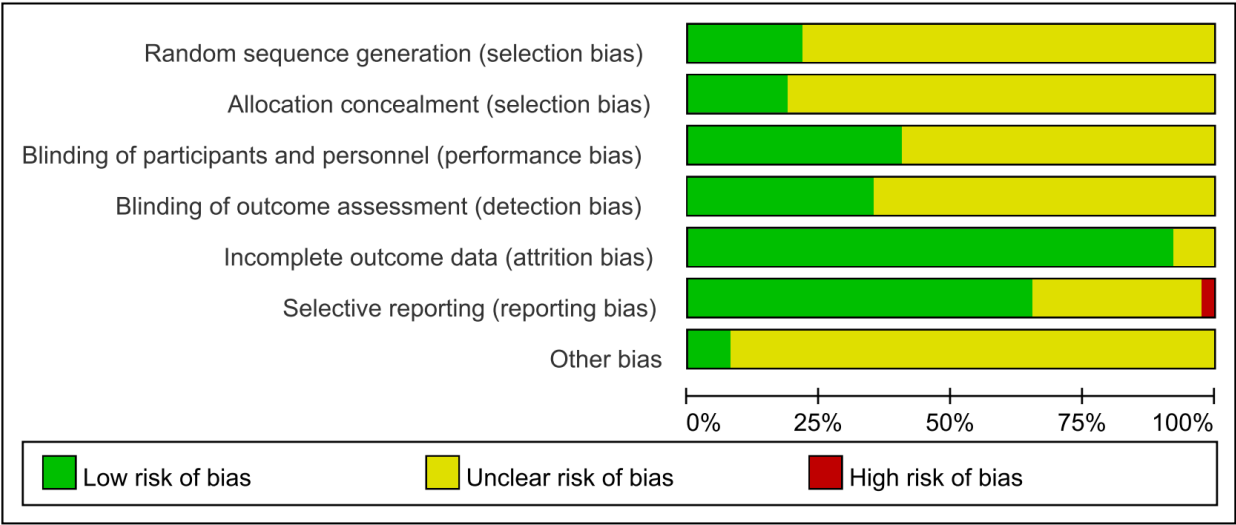

eFigure3. Summary of risk of bias on improvement of manic symptoms of the 41 included studies

|                 | Random sequence generation (selection bias) | Allocation concealment (selection bias) | Blinding of participants and personnel (performance bias) | Blinding of outcome assessment (detection bias) | Incomplete outcome data (attrition bias) | Selective reporting (reporting bias) | Other bias |
|-----------------|---------------------------------------------|-----------------------------------------|-----------------------------------------------------------|-------------------------------------------------|------------------------------------------|--------------------------------------|------------|
| Bourin 2014     | ?                                           | ?                                       | +                                                         | +                                               | +                                        | +                                    | ?          |
| Bowden 2005     | ?                                           | ?                                       | +                                                         | +                                               | +                                        | +                                    | ?          |
| Calabrese 2015  | ?                                           | ?                                       | ?                                                         | ?                                               | +                                        | +                                    | ?          |
| Cutler 2011     | +                                           | +                                       | +                                                         | +                                               | +                                        | +                                    | ?          |
| Durgam 2015     | ?                                           | ?                                       | ?                                                         | ?                                               | +                                        | +                                    | ?          |
| Feifel 2011     | ?                                           | ?                                       | ?                                                         | +                                               | ?                                        | +                                    | ?          |
| Garfinkel 1980  | ?                                           | ?                                       | +                                                         | +                                               | +                                        |                                      | ?          |
| Gopal 2005      | +                                           | ?                                       | ?                                                         | ?                                               | +                                        | ?                                    | ?          |
| Hirschfeld 2004 | ?                                           | ?                                       | +                                                         | +                                               | ?                                        | ?                                    | ?          |
| Kanba 2014      | ?                                           | ?                                       | ?                                                         | ?                                               | +                                        | +                                    | ?          |
| Katagiri 2012   | ?                                           | +                                       | ?                                                         | ?                                               | +                                        | +                                    | ?          |
| Keck 2003a      | ?                                           | ?                                       | ?                                                         | ?                                               | +                                        | +                                    | ?          |
| Keck 2003b      | ?                                           | ?                                       | +                                                         | ?                                               | +                                        | ?                                    | ?          |
| Keck 2009       | ?                                           | ?                                       | +                                                         | ?                                               | +                                        | +                                    | ?          |
| Khanna 2005     | ?                                           | ?                                       | ?                                                         | ?                                               | +                                        | ?                                    | ?          |
| Li 2008         | ?                                           | ?                                       | ?                                                         | +                                               | +                                        | +                                    | ?          |
| McIntyre 2005   | ?                                           | ?                                       | +                                                         | ?                                               | +                                        | +                                    | ?          |
| McIntyre 2009   | ?                                           | ?                                       | ?                                                         | ?                                               | +                                        | +                                    | ?          |
| McIntyre 2010   | ?                                           | ?                                       | +                                                         | ?                                               | +                                        | +                                    | ?          |
| Niufan 2008     | ?                                           | ?                                       | +                                                         | +                                               | +                                        | +                                    | ?          |
| Perlis 2006     | ?                                           | ?                                       | ?                                                         | ?                                               | +                                        | ?                                    | ?          |
| Potkin 2005     | +                                           | +                                       | +                                                         | +                                               | +                                        | +                                    | ?          |
| Sach 2015       | ?                                           | ?                                       | ?                                                         | ?                                               | +                                        | +                                    | ?          |
| Sachs 2006      | ?                                           | ?                                       | ?                                                         | ?                                               | +                                        | +                                    | ?          |
| Shafiti 2010    | ?                                           | ?                                       | ?                                                         | ?                                               | +                                        | ?                                    | +          |
| Shafiti 2018    | ?                                           | ?                                       | +                                                         | ?                                               | ?                                        | ?                                    | +          |
| Smulevich 2005  | ?                                           | ?                                       | +                                                         | ?                                               | +                                        | +                                    | ?          |
| Tohen 1999      | ?                                           | ?                                       | ?                                                         | ?                                               | +                                        | +                                    | ?          |
| Tohen 2000      | +                                           | ?                                       | ?                                                         | ?                                               | +                                        | ?                                    | ?          |
| Tohen 2002      | ?                                           | +                                       | ?                                                         | +                                               | +                                        | +                                    | ?          |
| Tohen 2008      | +                                           | +                                       | +                                                         | +                                               | +                                        | +                                    | ?          |
| Vieta 2010a     | +                                           | ?                                       | +                                                         | +                                               | +                                        | +                                    | ?          |
| Vieta 2010b     | ?                                           | ?                                       | ?                                                         | ?                                               | +                                        | +                                    | ?          |
| Vieta 2021(a+b) | +                                           | +                                       | ?                                                         | ?                                               | +                                        | ?                                    | ?          |
| Xu 2015         | +                                           | +                                       | ?                                                         | +                                               | +                                        | ?                                    | +          |
| Young 2009      | ?                                           | ?                                       | ?                                                         | ?                                               | +                                        | ?                                    | ?          |
| Zajacka 2002    | ?                                           | ?                                       | ?                                                         | ?                                               | +                                        | ?                                    | ?          |

eFigure 4. Network plot

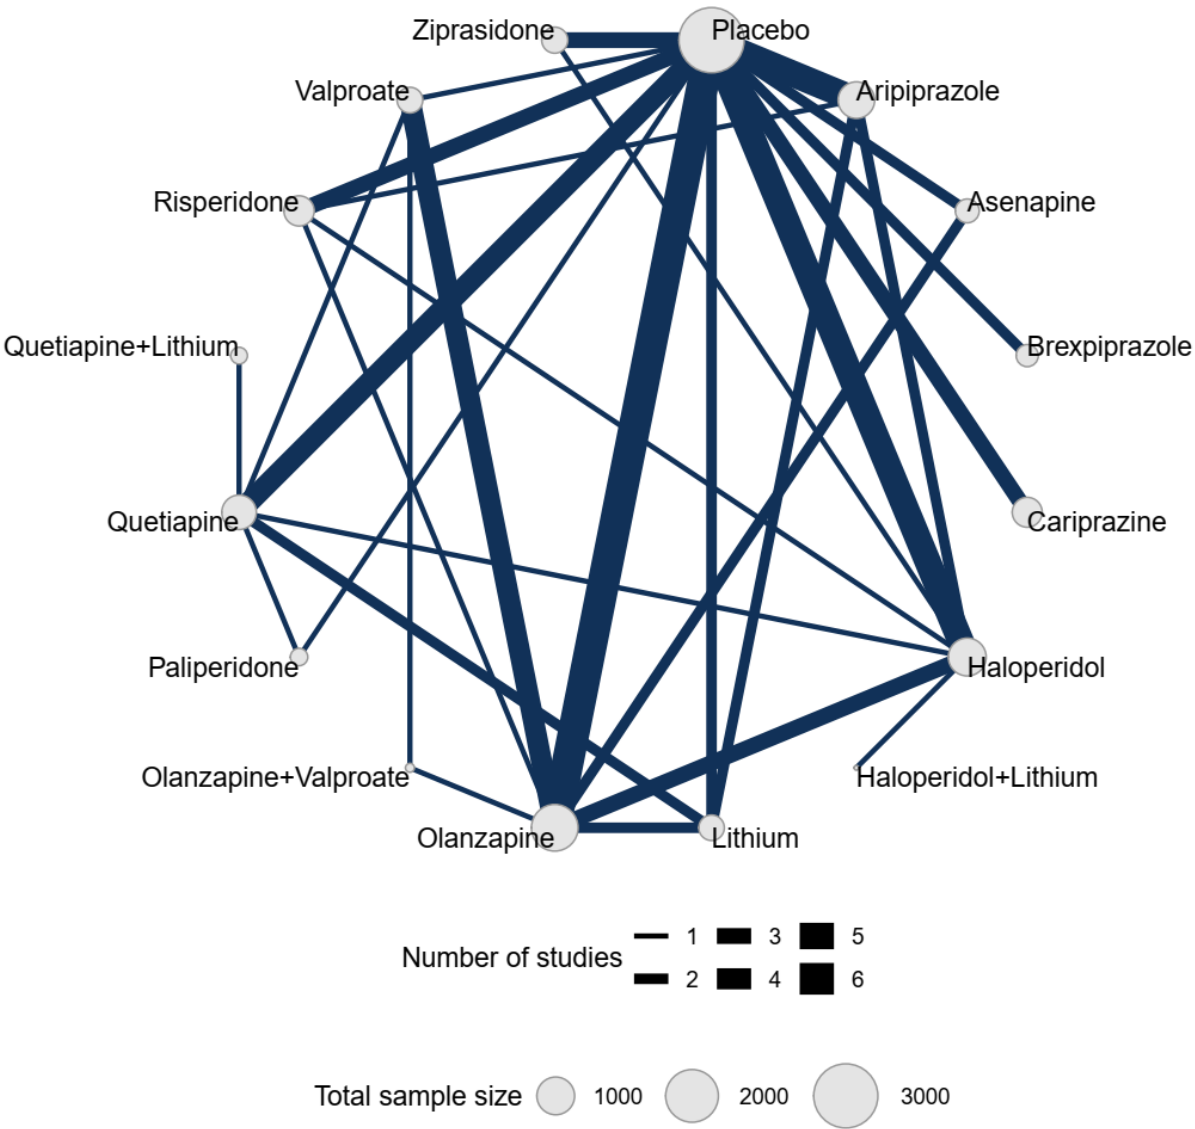

The size of the nodes corresponds to the number of participants assigned to each treatment, and the width of the lines corresponds to the number of trials evaluating the comparisons.

eFigure 5. Forest plot for local inconsistency test by node-splitting method

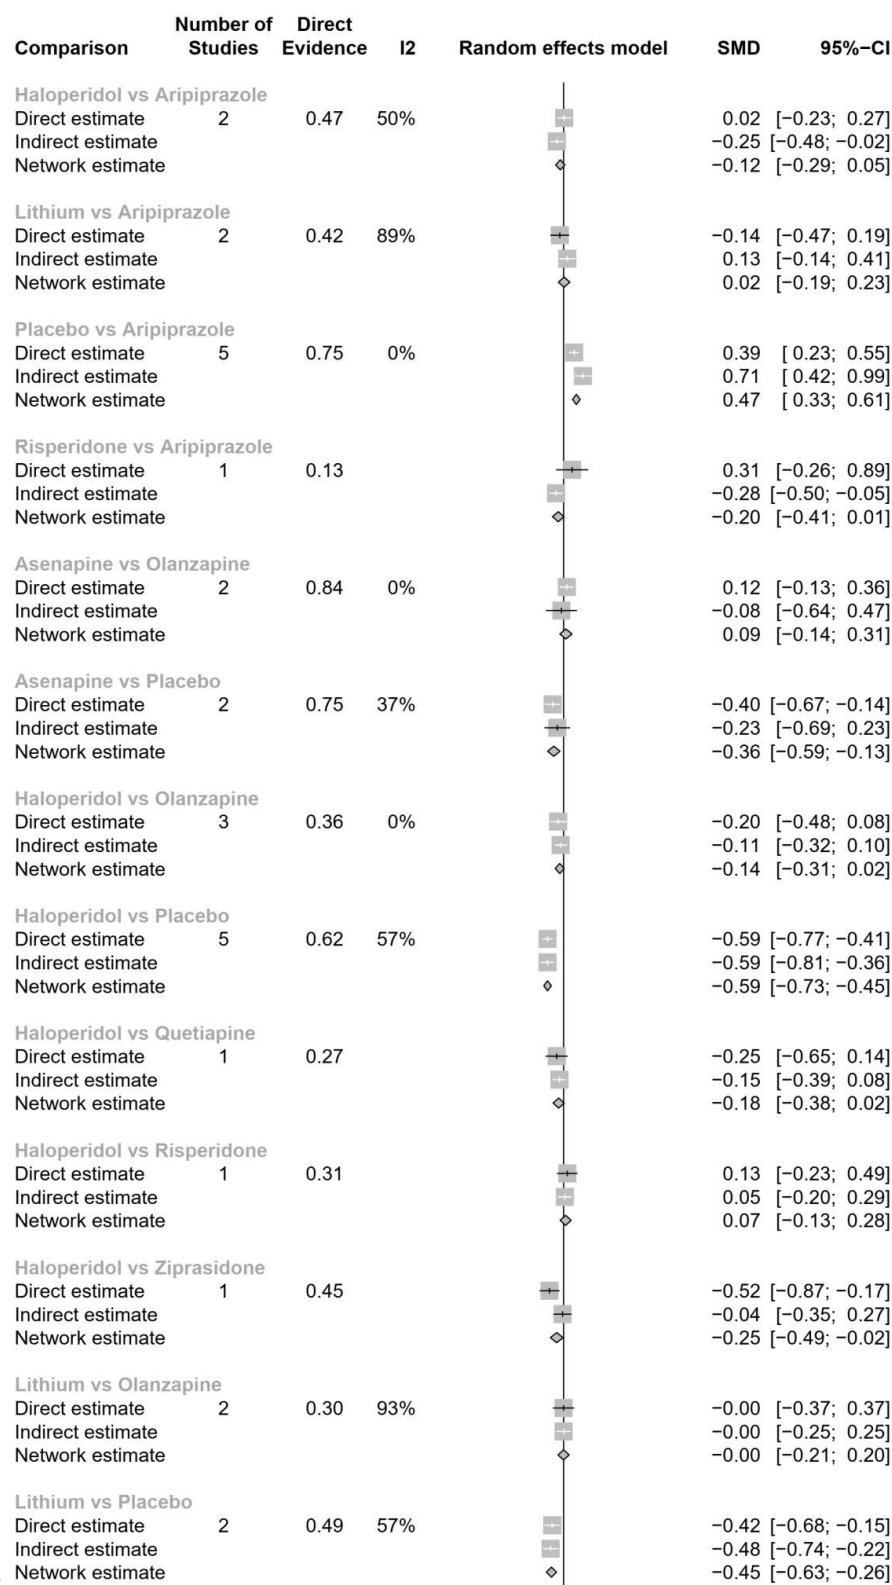

eFigure 5

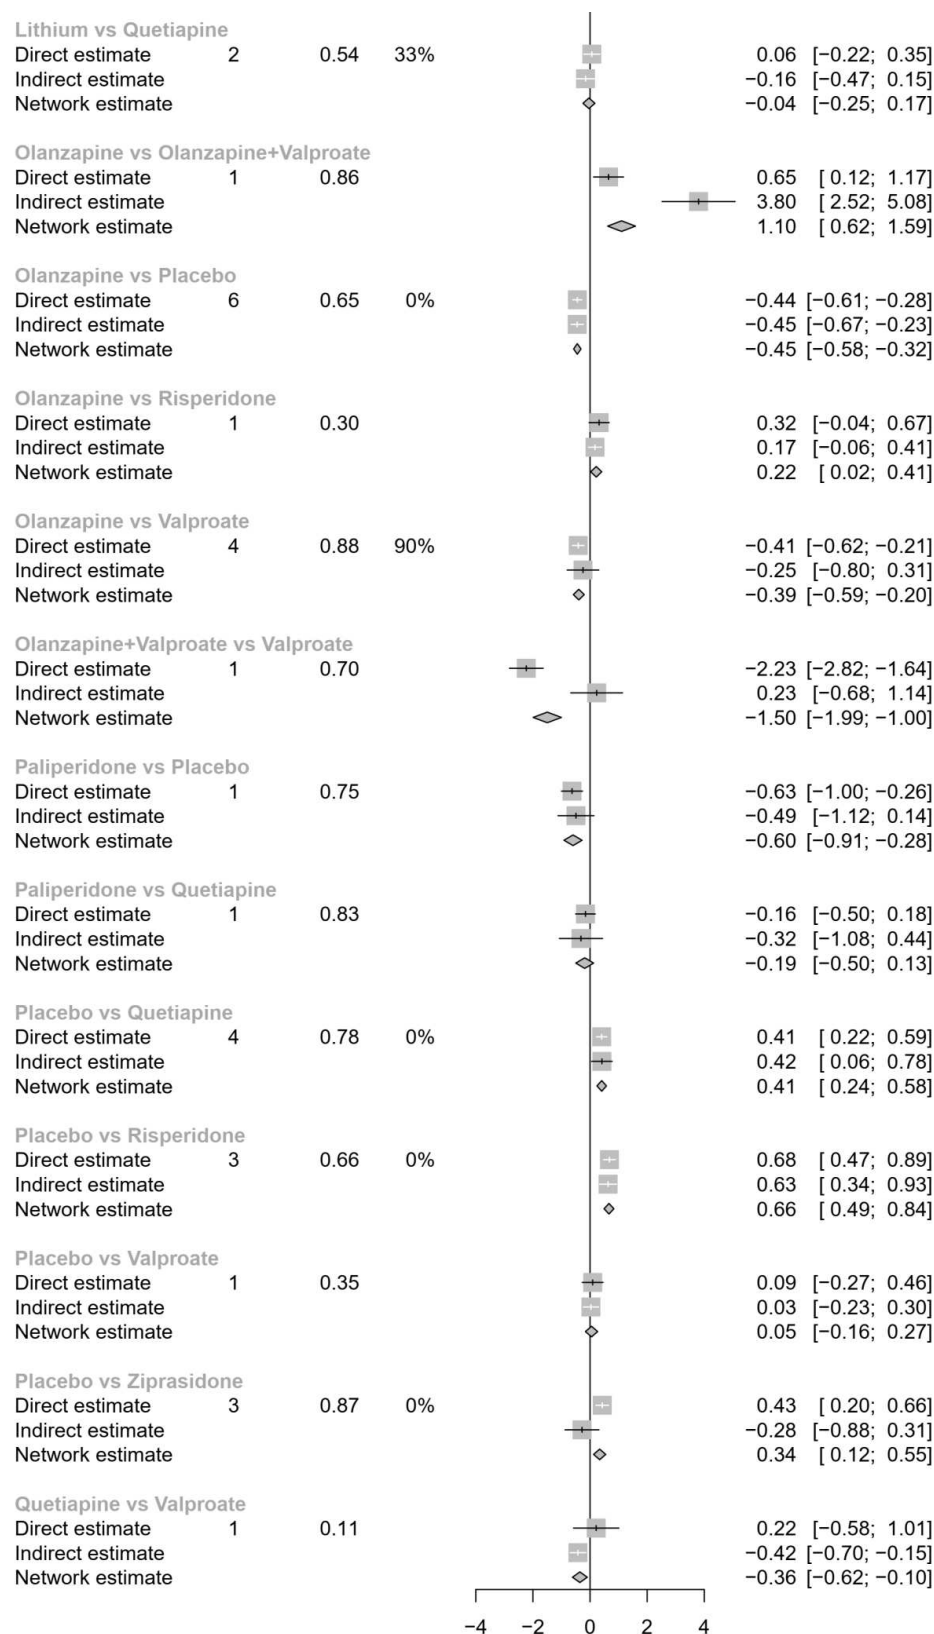

eFigure 6. Funnel plot with Egger’s test

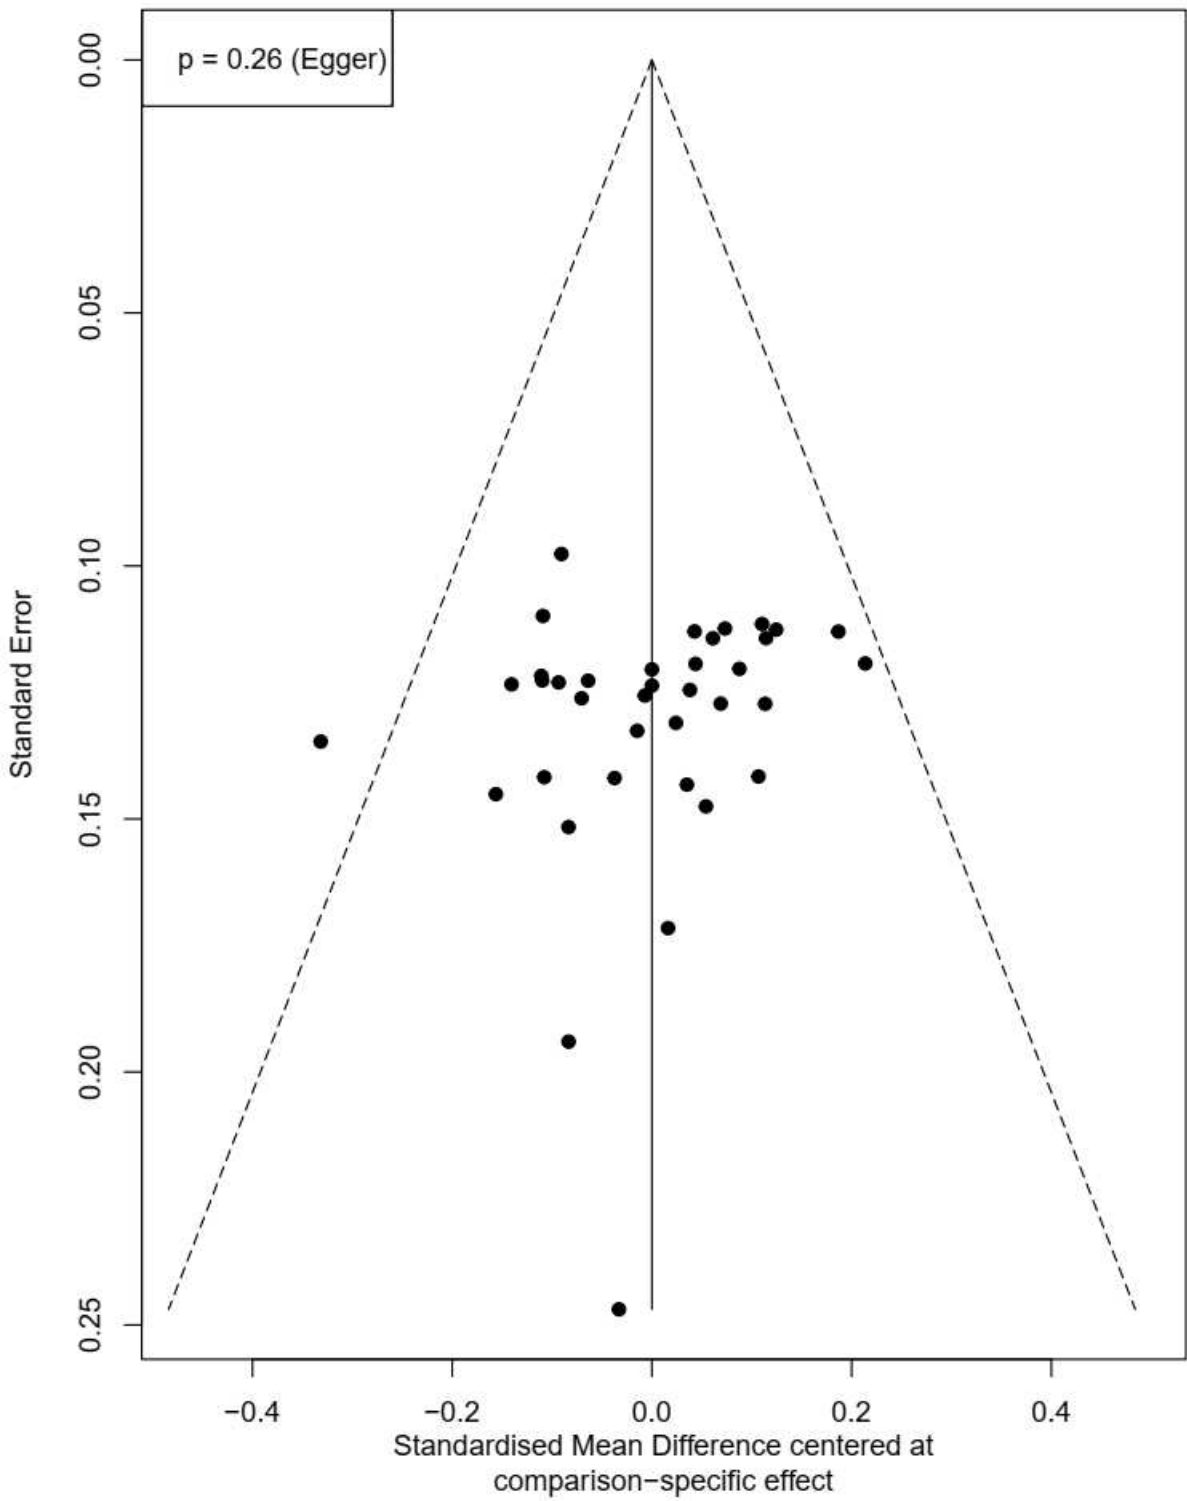

Supplement: bmjment-2022-300546supp002_data_supplement.pdf [file bmjment-2022-300546supp002_data_supplement.pdf]
