# Supplementary material for: Comparison of antipsychotic dose equivalents for acute bipolar mania and schizophrenia
Source: HighWire-hosted journal article supplement (doi:10.1136/bmjment-2022-300546), 2023-02-01
Supplement: bmjment-2022-300546supp001_data_supplement.pdf [file bmjment-2022-300546supp001_data_supplement.pdf]

Appendix 1. Checklist of PRISMA guideline

| Section and Topic             | Item # | Checklist item                                                                                                                                                                                                                                                                                       | Location where item is reported                        |
|-------------------------------|--------|------------------------------------------------------------------------------------------------------------------------------------------------------------------------------------------------------------------------------------------------------------------------------------------------------|--------------------------------------------------------|
| TITLE                         |        |                                                                                                                                                                                                                                                                                                      |                                                        |
| Title                         | 1      | Identify the report as a systematic review.                                                                                                                                                                                                                                                          | p. 1 title                                             |
| ABSTRACT                      |        |                                                                                                                                                                                                                                                                                                      |                                                        |
| Abstract                      | 2      | See the PRISMA 2020 for Abstracts checklist.                                                                                                                                                                                                                                                         | p.3 abstract                                           |
| INTRODUCTION                  |        |                                                                                                                                                                                                                                                                                                      |                                                        |
| Rationale                     | 3      | Describe the rationale for the review in the context of existing knowledge.                                                                                                                                                                                                                          | p.5-6 Background                                       |
| Objectives                    | 4      | Provide an explicit statement of the objective(s) or question(s) the review addresses.                                                                                                                                                                                                               | p.6 Objective                                          |
| METHODS                       |        |                                                                                                                                                                                                                                                                                                      |                                                        |
| Eligibility criteria          | 5      | Specify the inclusion and exclusion criteria for the review and how studies were grouped for the syntheses.                                                                                                                                                                                          | p.7 Search strategy and inclusion criteria             |
| Information sources           | 6      | Specify all databases, registers, websites, organisations, reference lists and other sources searched or consulted to identify studies. Specify the date when each source was last searched or consulted.                                                                                            | p.7 Search strategy and inclusion criteria             |
| Search strategy               | 7      | Present the full search strategies for all databases, registers and websites, including any filters and limits used.                                                                                                                                                                                 | p.7 Search strategy and inclusion criteria, Appendix 2 |
| Selection process             | 8      | Specify the methods used to decide whether a study met the inclusion criteria of the review, including how many reviewers screened each record and each report retrieved, whether they worked independently, and if applicable, details of automation tools used in the process.                     | p.7 Search strategy and inclusion criteria             |
| Data collection process       | 9      | Specify the methods used to collect data from reports, including how many reviewers collected data from each report, whether they worked independently, any processes for obtaining or confirming data from study investigators, and if applicable, details of automation tools used in the process. | p.8 Outcome measures and target population             |
| Data items                    | 10a    | List and define all outcomes for which data were sought. Specify whether all results that were compatible with each outcome domain in each study were sought (e.g. for all measures, time points, analyses), and if not, the methods used to decide which results to collect.                        | p.8 Outcome measures and target population             |
|                               | 10b    | List and define all other variables for which data were sought (e.g. participant and intervention characteristics, funding sources). Describe any assumptions made about any missing or unclear information.                                                                                         | p.8 Outcome measures and target population             |
| Study risk of bias assessment | 11     | Specify the methods used to assess risk of bias in the included studies, including details of the tool(s) used, how many reviewers assessed each study and whether they worked independently, and if applicable, details of automation tools used in the process.                                    | p.8 Outcome measures and target population             |
| Effect measures               | 12     | Specify for each outcome the effect measure(s) (e.g. risk ratio, mean difference) used in the synthesis or presentation of results.                                                                                                                                                                  | p.8 Outcome measures and target population             |
| Synthesis methods             | 13a    | Describe the processes used to decide which studies were eligible for each synthesis (e.g. tabulating the study intervention characteristics and comparing against the planned groups for each synthesis (item #5)).                                                                                 | p.8~9 Data analysis                                    |
|                               | 13b    | Describe any methods required to prepare the data for presentation or synthesis, such as handling of missing summary statistics, or data conversions.                                                                                                                                                | p.8 Outcome measures and target population             |
|                               | 13c    | Describe any methods used to tabulate or visually display results of individual studies and syntheses.                                                                                                                                                                                               | p.8~9 Data analysis                                    |

| Section and Topic             | Item # | Checklist item                                                                                                                                                                                                                                                                       | Location where item is reported                        |
|-------------------------------|--------|--------------------------------------------------------------------------------------------------------------------------------------------------------------------------------------------------------------------------------------------------------------------------------------|--------------------------------------------------------|
|                               | 13d    | Describe any methods used to synthesize results and provide a rationale for the choice(s). If meta-analysis was performed, describe the model(s), method(s) to identify the presence and extent of statistical heterogeneity, and software package(s) used.                          | p.8~9 Data analysis                                    |
|                               | 13e    | Describe any methods used to explore possible causes of heterogeneity among study results (e.g. subgroup analysis, meta-regression).                                                                                                                                                 | p.8~9 Data analysis                                    |
|                               | 13f    | Describe any sensitivity analyses conducted to assess robustness of the synthesized results.                                                                                                                                                                                         | p.8~9 Data analysis                                    |
| Reporting bias assessment     | 14     | Describe any methods used to assess risk of bias due to missing results in a synthesis (arising from reporting biases).                                                                                                                                                              | p.8 Outcome measures and target population             |
| Certainty assessment          | 15     | Describe any methods used to assess certainty (or confidence) in the body of evidence for an outcome.                                                                                                                                                                                | p.8~9 Data analysis                                    |
| RESULTS                       |        |                                                                                                                                                                                                                                                                                      |                                                        |
| Study selection               | 16a    | Describe the results of the search and selection process, from the number of records identified in the search to the number of studies included in the review, ideally using a flow diagram.                                                                                         | Figure 1 (PRISMA 2020 flow diagram)                    |
|                               | 16b    | Cite studies that might appear to meet the inclusion criteria, but which were excluded, and explain why they were excluded.                                                                                                                                                          | Appendix 2                                             |
| Study characteristics         | 17     | Cite each included study and present its characteristics.                                                                                                                                                                                                                            | eTable 1                                               |
| Risk of bias in studies       | 18     | Present assessments of risk of bias for each included study.                                                                                                                                                                                                                         | eFigure 2, eFigure 3                                   |
| Results of individual studies | 19     | For all outcomes, present, for each study: (a) summary statistics for each group (where appropriate) and (b) an effect estimate and its precision (e.g. confidence/credible interval), ideally using structured tables or plots.                                                     | p.10 2nd paragraph of Findings<br>Figure 1             |
| Results of syntheses          | 20a    | For each synthesis, briefly summarise the characteristics and risk of bias among contributing studies.                                                                                                                                                                               | p.10 1st paragraph of Findings                         |
|                               | 20b    | Present results of all statistical syntheses conducted. If meta-analysis was done, present for each the summary estimate and its precision (e.g. confidence/credible interval) and measures of statistical heterogeneity. If comparing groups, describe the direction of the effect. | p.10 2nd paragraph of Findings                         |
|                               | 20c    | Present results of all investigations of possible causes of heterogeneity among study results.                                                                                                                                                                                       | p.10 2nd paragraph of Findings<br>eFigure 5            |
|                               | 20d    | Present results of all sensitivity analyses conducted to assess the robustness of the synthesized results.                                                                                                                                                                           | eTable 3, eTable 4<br>p.10 2nd paragraph of Findings   |
| Reporting biases              | 21     | Present assessments of risk of bias due to missing results (arising from reporting biases) for each synthesis assessed.                                                                                                                                                              | eFigure 2, eFigure 3<br>p.10 1st paragraph of Findings |
| Certainty of evidence         | 22     | Present assessments of certainty (or confidence) in the body of evidence for each outcome assessed.                                                                                                                                                                                  | eTable 5                                               |
| DISCUSSION                    |        |                                                                                                                                                                                                                                                                                      |                                                        |
| Discussion                    | 23a    | Provide a general interpretation of the results in the context of other evidence.                                                                                                                                                                                                    | p12 2nd paragraph of Discussion                        |

| Section and Topic                              | Item # | Checklist item                                                                                                                                                                                                                             | Location where item is reported                     |
|------------------------------------------------|--------|--------------------------------------------------------------------------------------------------------------------------------------------------------------------------------------------------------------------------------------------|-----------------------------------------------------|
|                                                | 23b    | Discuss any limitations of the evidence included in the review.                                                                                                                                                                            | p14 Limitation                                      |
|                                                | 23c    | Discuss any limitations of the review processes used.                                                                                                                                                                                      | p14 Limitation                                      |
|                                                | 23d    | Discuss implications of the results for practice, policy, and future research.                                                                                                                                                             | p15 Clinical implications                           |
| OTHER INFORMATION                              |        |                                                                                                                                                                                                                                            |                                                     |
| Registration and protocol                      | 24a    | Provide registration information for the review, including register name and registration number, or state that the review was not registered.                                                                                             | Open Science Framework (DOI: 10.17605/OSF.IO/CYPV6) |
|                                                | 24b    | Indicate where the review protocol can be accessed, or state that a protocol was not prepared.                                                                                                                                             | Open Science Framework (DOI: 10.17605/OSF.IO/CYPV6) |
|                                                | 24c    | Describe and explain any amendments to information provided at registration or in the protocol.                                                                                                                                            | None                                                |
| Support                                        | 25     | Describe sources of financial or non-financial support for the review, and the role of the funders or sponsors in the review.                                                                                                              | None                                                |
| Competing interests                            | 26     | Declare any competing interests of review authors.                                                                                                                                                                                         | None                                                |
| Availability of data, code and other materials | 27     | Report which of the following are publicly available and where they can be found: template data collection forms; data extracted from included studies; data used for all analyses; analytic code; any other materials used in the review. | Supplementary and appendix                          |

**Appendix 2.****Database****MEDLINE search strategy**

- 1 "bipolar and related disorders"/ or "bipolar and related disorders".mp. or bipolar disorder/ or "bipolar disorder".mp.(54249)
- 2 (mania or manic).mp.(19561)
- 3 affective psychosis.mp.(1014)
- 4 rapid cycling.mp.(1360)
- 5 (psychos\* or psychotic or anti-psycho\* or antipsycho\*).ti,kf.(107641)
- 6 or/1-5(159894)
- 7 Amisulpride/ or Amisulpride.mp.(1393)
- 8 Blonanserin.mp.(178)
- 9 Risperidone/ or Risperidone.mp.(10808)
- 10 Quetiapine Fumarate/ or Quetiapine Fumarate.mp.(3103)
- 11 Paliperidone Palmitate/ or Paliperidone Palmitate.mp. or Paliperidone.mp.(1643)
- 12 Lumateperone.mp. (45)
- 13 Olanzapine/ or Olanzapine.mp.(10059)
- 14 Lurasidone Hydrochloride/ or Lurasidone Hydrochloride.mp. (332)
- 15 Haloperidol/ or Haloperidol.mp.(22927)
- 16 cariprazine.mp. (330)
- 17 Perospirone.mp. (161)
- 18 asenapine.mp.(467)
- 19 Aripiprazole/ or Aripiprazole.mp.(4815)
- 20 Clozapine/ or Clozapine.mp.(13884)
- 21 Brexpiprazole.mp.(282)
- 22 lloperidone.mp.(224)
- 23 Melperone.mp.(154)
- 24 Pimavanserin.mp.(263)
- 25 Remoxipride/ or Remoxipride.mp. (380)
- 26 Ziprasidone.mp.(2091)
- 27 Antipsychotic Agents/ or Antipsychotic Agents.mp.(58790)
- 28 or/7-27(85330)
- 29 6 and 28(25437)
- 30 randomized controlled trial.pt.(576271)
- 31 randomi\*.ti,ab,kf.(750128)
- 32 (RCT or at random or (random\* adj (assign\* or allocat\* or divid\* or division or number))).ti,ab,kf.(263507)
- 33 trial.ti.(265008)
- 34 clinical trials as topic.sh. (200326)
- 35 placebo.ti,ab,kf. (235339)
- 36 ((singl\* or doubl\* or trebl\* or tripl\*) adj3 (blind\* or mask\* or dummy)).ti,ab,kf.

(191378)

37 or/30-36 (1348988)

38 29 and 37(4653)

39 exp animals/ not humans.sh. (5042390)

40 38 not 39(4629)

### Cochrane Central Register of Controlled Trials(CENTRAL) search strategy

#1 MeSH descriptor: [Bipolar Disorder] explode all trees (2890)

#2 (bipolar disorder):ti,ab,kw(7150)

#3 MeSH descriptor: [Bipolar and Related Disorders] explode all trees(2891)

#4 (bipolar and related disorders):ti,ab,kw(1658)

#5 MeSH descriptor: [Mania] explode all trees (21)

#6 (mania or manic):ti,ab,kw(3429)

#7 (affective psychosis):ti,ab,kw(927)

#8 (rapid cycling):ti,ab,kw(1921)

#9 #1 or #2 or #3 or #4 or #5 or #6 or #7 or #8(10562)

#10 MeSH descriptor: [Risperidone] explode all trees (1443)

#11 (Risperidone):ti,ab,kw(3658)

#12 MeSH descriptor: [Quetiapine Fumarate] explode all trees (749)

#13 (Quetiapine):ti,ab,kw(1998)

#14 MeSH descriptor: [Paliperidone Palmitate] explode all trees(252)

#15 (Paliperidone):ti,ab,kw(655)

#16 MeSH descriptor: [Amisulpride] explode all trees (149)

#17 (Amisulpride):ti,ab,kw(512)

#18 MeSH descriptor: [Olanzapine] explode all trees(1354)

#19 (Olanzapine):ti,ab,kw(3698)

#20 MeSH descriptor: [Haloperidol] explode all trees (1425)

#21 (Haloperidol):ti,ab,kw(3266)

#22 (cariprazine):ti,ab,kw(188)

#23 (asenapine):ti,ab,kw(194)

#24 MeSH descriptor: [Aripiprazole] explode all trees (626)

#25 (Aripiprazole):ti,ab,kw(1704)

#26 MeSH descriptor: [Clozapine] explode all trees(527)

#27 (Clozapine):ti,ab,kw(1559)

#28 (Blonanserin):ti,ab,kw(67)

#29 (Brexipiprazole):ti,ab,kw (174)

#30 (lloperidone):ti,ab,kw(71)

#31 (Lumateperone):ti,ab,kw(50)

#32 MeSH descriptor: [Lurasidone Hydrochloride] explode all trees(119)

#33 (Lurasidone):ti,ab,kw(504)

#34 (Melperone):ti,ab,kw(36)

#35 (Perospirone):ti,ab,kw(38)

#36 (Pimavanserin):ti,ab,kw(113)

#37 MeSH descriptor: [Remoxipride] explode all trees(55)

#38 (Remoxipride):ti,ab,kw(86)

#39 (Ziprasidone):ti,ab,kw(780)

#40 #10 or #11 or #12 or #13 or #14 or #15 or #16 or #17 or #18 or #19 or #20 or #21 or #22 #23 or #24 or #25 or #26 or #27 or #28 or #29 or #30 or #31 or #32 or #33 or #34 or #35 or #36 or #37 or #38 or #39(12624)

#41 #9 and #40(2002)

#42 (randomized controlled trial):ti,ab,kw(736915)

#43 #41 and #42(890)

### Embase search strategy

#1. 'bipolar disorder'/exp OR 'bipolar disorder' (85,016)

#2. 'bipolar and related disorders'/exp OR 'bipolar and related disorders' (79,962)

#3. 'mania'/exp OR mania (93,293)

#4. 'affective psychosis'/exp OR 'affective psychosis' (2,814)

#5. 'rapid cycling' (2,087)

#6. 'psychotic'/exp OR psychotic (331,035)

#7. 'risperidone'/exp OR risperidone (39,343)

#8. 'quetiapine'/exp OR quetiapine (25,746)

#9. 'paliperidone'/exp OR paliperidone (5,208)

#10. 'amisulpride'/exp OR amisulpride(6,125)

#11. 'olanzapine'/exp OR olanzapine (36,912)

#12. 'haloperidol'/exp OR haloperidol (62,652)

#13. 'cariprazine'/exp OR cariprazine (732)

#14. 'asenapine'/exp OR asenapine (1,659)

#15. 'aripiprazole'/exp OR aripiprazole (17,284)

#16. 'clozapine'/exp OR clozapine (35,875)

#17. 'blonanserin'/exp OR blonanserin(470)

#18. 'brexpiprazole'/exp OR brexpiprazole (628)

#19. 'iloperidone'/exp OR iloperidone (895)

#20. 'lumateperone'/exp OR lumateperone(129)

#21. 'lurasidone'/exp OR lurasidone (1,982)

#22. 'melperone'/exp OR melperone(952)

#23. 'perospirone'/exp OR perospirone(510)

#24. 'pimavanserin'/exp OR pimavanserin(644)

#25. 'remoxipride'/exp OR remoxipride(1,037)

#26. 'ziprasidone'/exp OR ziprasidone (9,535)

#27. #1 OR #2 OR #3 OR #4 OR #5 OR #6 (392,373)

#28. #7 OR #8 OR #9 OR #10 OR #11 OR #12 OR #13 OR #14 OR #15 OR #16 OR #17 OR #18 OR #19 OR #20 OR #21 OR #22 OR #23 OR #24 OR #25 OR #26 (134,246)

#29. #27 AND #28 (134,246)

#30. #29 AND 'randomized controlled trial'/de (3,987)

**PsycINFO search strategy**

S1 bipolar disorder OR (bipolar and related disorders)(44,887)  
 S2 mania OR manic (25,051)  
 S3 affective psychosis(1,906)  
 S4 rapid cycling (1,096)  
 S5 psychotic (107,242)  
 S6 S1 OR S2 OR S3 OR S4 OR S5 (150,936)  
 S7 risperidone(7,854)  
 S8 quetiapineorseroquel (4,104)  
 S9 paliperidone (879)  
 S10 Amisulpride(848)  
 S11 Olanzapine(6,762)  
 S12 haloperidol (10,033)  
 S13 cariprazine (152)  
 S14 asenapine(251)  
 S15 aripiprazole(3,212)  
 S16 clozapine(8,849)  
 S17 Blonanserin(102)  
 S18 brexpiprazole(132)  
 S19 iloperidone(106)  
 S20 lumateperone(13)  
 S21 lurasidone(297)  
 S22 Melperone(66)  
 S23 Perospirone(101)  
 S24 Pimavanserin(81)  
 S25 Remoxipride(178)  
 S26 ziprasidone(1,388)  
 S27 S7 OR S8 OR S9 OR S10 OR S11 OR S12 OR S13 OR S14 OR S15 OR S16 OR S17 OR  
 S18 OR S19 OR S20 OR S21 OR S22 OR S23 OR S24 OR S25 OR S26(29,614)  
 S28 S6 and S27(10,526)  
 S29 S28 AND randomized controlled trial(1,025)

**ClinicalTrials.gov (<https://clinicaltrials.gov/>)**

Olanzapine | Bipolar Disorder, Manic(26)  
 Risperdal | Bipolar Disorder, Manic (6)  
 Quetiapine | Bipolar Disorder, Manic (29)  
 Paliperidone | Bipolar Disorder, Manic (5)  
 Amisulpride | Bipolar Disorder, Manic (1)  
 Haloperidol | Bipolar Disorder, Manic (6)  
 Cariprazine | Bipolar Disorder, Manic (3)  
 Asenapine | Bipolar Disorder, Manic (11)  
 Aripiprazole | Bipolar Disorder, Manic (18)  
 Clozapine | Bipolar Disorder, Manic (1)

Blonanserin | Bipolar Disorder, Manic (0)  
Iloperidone | Bipolar Disorder, Manic (0)  
Lumateperone | Bipolar Disorder, Manic (0)  
Lurasidone | Bipolar Disorder, Manic (1)  
Melperone | Bipolar Disorder, Manic (0)  
Perospirone | Bipolar Disorder, Manic (0)  
Pimavanserin | Bipolar Disorder, Manic (0)  
Remoxipride | Bipolar Disorder, Manic (0)  
Ziprasidone | Bipolar Disorder, Manic (15)

**World Health Organization (ICTRP)(<https://trialsearch.who.int/AdvSearch.aspx>)**

(Bipolar Disorder or Mania) AND Risperidone (8)  
(Bipolar Disorder or Mania) AND Quetiapine (23)  
(Bipolar Disorder or Mania) AND Paliperidone (3)  
(Bipolar Disorder or Mania) AND Olanzapine (13)  
(Bipolar Disorder or Mania) AND Haloperidol (1)  
(Bipolar Disorder or Mania) AND Cariprazine (5)  
(Bipolar Disorder or Mania) AND Asenapine (8)  
(Bipolar Disorder or Mania) AND Aripiprazole (21)  
(Bipolar Disorder or Mania) AND Clozapine (0)  
(Bipolar Disorder or Mania) AND Blonanserin (0)  
(Bipolar Disorder or Mania) AND Brexpiprazole (6)  
(Bipolar Disorder or Mania) AND Iloperidone (1)  
(Bipolar Disorder or Mania) AND Lumateperone (2)  
(Bipolar Disorder or Mania) AND Lurasidone (5)  
(Bipolar Disorder or Mania) AND Melperone (0)  
(Bipolar Disorder or Mania) AND Perospirone (0)  
(Bipolar Disorder or Mania) AND Pimavanserin (0)  
(Bipolar Disorder or Mania) AND Remoxipride (0)  
(Bipolar Disorder or Mania) AND Ziprasidone (15)

CENTRAL: Cochrane Central Register of Controlled Trials



**Conference abstract (n = 9)**

1. Adewuya AO, Makanjuola ROA. A double blind randomised controlled trial of haloperidol vs. carbamazepine vs. valproate monotherapy in acute manic episodes. *World psychiatry*. 2009;8(Suppl 1):187.
2. Bose A, Starace A, Wang Q, Diaz E, Goodman J, Ruth A, et al. Cariprazine in the treatment of acute mania in bipolar disorder: a double-blind, placebo-controlled, phase III trial. *International journal of neuropsychopharmacology*. 2012;15:111-2.
3. Buckley PF, Paulsson B, Brecher M. Treatment of agitation and aggression in bipolar mania: efficacy of quetiapine. *Journal of affective disorders*. 2007;100 Suppl 1:S33-43.
4. Calabrese J, Lu K, Laszlovszky I, DeBelle M, Earley W, Durgam S. Efficacy of cariprazine in patients with acute manic or mixed episodes associated with bipolar I disorder: results from 2 phase III, placebo-controlled trials. *Bipolar disorders*. 2014;16:93.
5. Fricchione Parise V, Addeo L, Laezza R, Di Benedetto R, De Vivo E, Bianco P. Lithium versus quetiapine and aripiprazole: Real-world comparative effectiveness on bipolar disorder patients. *European Neuropsychopharmacology*. 2019;29:S336-S7.
6. Ketter TA, Jones M, Paulsson B. Rates of remission/euthymia with quetiapine monotherapy compared with placebo in patients with acute mania. *Journal of affective disorders*. 2007;100 Suppl 1:S45-53.
7. Laszlovszky I, Bose A, Andor G, Nemeth G, Werner P. The efficacy and tolerability of cariprazine in acute mania associated with bipolar I disorder: a phase II trial. *International clinical psychopharmacology*. 2011;26:e15.
8. Madera J, Jin N, Amatniek J, Johnson B, Baker RA, Such P. Remission and recovery in patients with bipolar I disorder (BP-I) treated with aripiprazole once-monthly (AOM 400). *Neuropsychopharmacology*. 2017;43:S528.
9. McIntyre RS, Konarski JZ, Jones M, Paulsson B. Quetiapine in the treatment of acute bipolar mania: efficacy across a broad range of symptoms. *Journal of affective disorders*. 2007;100 Suppl 1:S5-14.

**Not double-blinded randomized clinical trials (n=12)**

1. Altamura AC, Salvadori D, Madaro D, Santini A, Mundo E. Efficacy and tolerability of quetiapine in the treatment of bipolar disorder: preliminary evidence from a 12-month open-label study. *Journal of affective disorders*. 2003;76(1-3):267-71.
2. Azorin JM, Luquiens A, Aubrun E, Reed C, Gasquet I, Lukasiewicz M. Management of patients with acute manic or mixed episodes and outcome at three months. *Encephale*. 2010;36(3):226-35.
3. Bahk W-M, Yoon B-H, Lee K-U, Chae J-H. Combination of mood stabilizers with quetiapine for treatment of acute bipolar disorder: an open label study. *Human psychopharmacology*. 2004;19(3):181-5.
4. Buoli M, Esposito CM, Godio M, Caldiroli A, Serati M, Altamura AC. Have antipsychotics a different speed of action in the acute treatment of mania? A single-blind comparative study. *Journal of psychopharmacology (Oxford, England)*. 2017;31(12):1537-43.
5. Chen J, Muzina DJ, Kemp DE, Conroy C, Chan P, Serrano MB, et al. Safety and efficacy of olanzapine monotherapy in treatment-resistant bipolar mania: a 12-week open-label study. *Human psychopharmacology*. 2011;26(8):588-95.
6. Forsthoff A, Grunze H, Seemuller F, Stampfer R, Dittmann S, Amann B, et al. Risperidone monotherapy in manic inpatients: an open label, multicentre trial. *The world journal of biological psychiatry : the official journal of the World Federation of Societies of Biological Psychiatry*. 2007;8(4):256-61.
7. Novick D, Reed C, Haro JM, Gonzalez-Pinto A, Perrin E, Aguado J, et al. Comparison of olanzapine and risperidone in the EMBLEM Study: translation of randomized controlled trial findings into clinical practice. *International clinical psychopharmacology*. 2010;25(5):257-63.
8. Pae C-U, Masand PS, Mandel FS, O'Gorman C. Achieving and sustaining remission in bipolar I disorder with ziprasidone : a post hoc analysis of a 24-week, double-blind, placebo-controlled study. *Clinical drug investigation*. 2012;32(11):747-54.
9. Pae CU, Masand PS, Mandel FS, O'Gorman C. Achieving and sustaining remission in bipolar I disorder with ziprasidone : a post hoc analysis of a 24-week, double-blind, placebo-controlled study. *Clinical drug investigation*. 2012;32(11):747-54.
10. Sekhar S, Kalra B, Mendhekar DN, Tekur U. Efficacy of sodium valproate and haloperidol in the management of acute mania: a randomized open-label comparative study. *Journal of clinical pharmacology*. 2010;50(6):688-92.

11. Shi L, Juarez R, Hackworth J, Edgell ET, Haro JM, Vieta E, et al. Open-label olanzapine treatment in bipolar I disorder: clinical and work functional outcomes. *Current medical research and opinion*. 2006;22(5):961-6.
12. Shi L, Namjoshi MA, Zhang F, Gandhi G, Edgell ET, Tohen M, et al. Olanzapine versus haloperidol in the treatment of acute mania: clinical outcomes, health-related quality of life and work status. *International clinical psychopharmacology*. 2002;17(5):227-37.

**No outcome of interest (n=116)**

1. Azorin JM, Sapin C, Weiller E. Effect of asenapine on manic and depressive symptoms in bipolar I patients with mixed episodes: results from post hoc analyses. *Journal of affective disorders*. 2013;145(1):62-9.
2. Bahk W-M, Shin Y-C, Woo J-M, Yoon B-H, Lee J-S, Jon D-I, et al. Topiramate and divalproex in combination with risperidone for acute mania: a randomized open-label study. *Progress in neuro-psychopharmacology & biological psychiatry*. 2005;29(1):115-21.
3. Barekatin M, Fatemi A, Bashardoost N, Darougheh A, Salehi M, Asadollahi GH. Valproate-risperidone valproate-lithium combination in acute mania. *Journal of Research in Medical Sciences*. 2005;10(5):274-80.
4. Bersudsky Y, Applebaum J, Gaiduk Y, Sharony L, Mishory A, Podberezsky A, et al. Valnoctamide as a valproate substitute with low teratogenic potential in mania: a double-blind, controlled, add-on clinical trial. *Bipolar disorders*. 2010;12(4):376-82.
5. Berwaerts J, Lane R, Nuamah IF, Lim P, Remmerie B, Hough DW. Paliperidone extended-release as adjunctive therapy to lithium or valproate in the treatment of acute mania: a randomized, placebo-controlled study. *Journal of affective disorders*. 2011;129(1-3):252-60.
6. Berwaerts J, Melkote R, Nuamah I, Lim P. A randomized, placebo- and active-controlled study of paliperidone extended-release as maintenance treatment in patients with bipolar I disorder after an acute manic or mixed episode. *Journal of affective disorders*. 2012;138(3):247-58.
7. Bobo WV, Reilly-Harrington NA, Ketter TA, Brody BD, Kinrys G, Kemp DE, et al. Effect of adjunctive benzodiazepines on clinical outcomes in lithium- or quetiapine-treated outpatients with bipolar I or II disorder: results from the Bipolar CHOICE trial. *Journal of affective disorders*. 2014;161:30-5.

8. Bowden C, Karayal O, Gundapaneni B, O'Gorman C, Pappadopulos E, Schwartz J. Treatment outcomes based on disease severity for subjects with bipolar I disorder treated with ziprasidone plus a mood stabilizer. *Bipolar disorders*. 2010;12:10.
9. Bowden CL, Myers JE, Grossman F, Xie Y. Risperidone in combination with mood stabilizers: a 10-week continuation phase study in bipolar I disorder. *The Journal of clinical psychiatry*. 2004;65(5):707-14.
10. Brown D, Silverstone T, Cookson J. Carbamazepine compared to haloperidol in acute mania. *International clinical psychopharmacology*. 1989;4(3):229-38.
11. Calabrese JR, Rapport DJ, Youngstrom EA, Jackson K, Bilali S, Findling RL. New data on the use of lithium, divalproate, and lamotrigine in rapid cycling bipolar disorder. *European psychiatry : the journal of the Association of European Psychiatrists*. 2005;20(2):92-5.
12. Carlson BX, Ketter TA, Sun W, Timko K, McQuade RD, Sanchez R, et al. Aripiprazole in combination with lamotrigine for the long-term treatment of patients with bipolar I disorder (manic or mixed): a randomized, multicenter, double-blind study (CN138-392). *Bipolar disorders*. 2012;14(1):41-53.
13. Carta MG, Zairo F, Mellino G, Hardoy MC, Vieta E. An open label follow-up study on amisulpride in the add-on treatment of bipolar I patients. *Clinical practice and epidemiology in mental health : CP & EMH*. 2006;2:19.
14. Chan HY, Jou SH, Juang YY, Chang CJ, Chen JJ, Chen CH, et al. A single-blind, comparative study of zotepine versus haloperidol in combination with a mood stabilizer for patients with moderate-to-severe mania. *Psychiatry and Clinical Neurosciences*. 2010;64(2):162-9.
15. Chou JC, Czobor P, Charles O, Tuma I, Winsberg B, Allen MH, et al. Acute mania: haloperidol dose and augmentation with lithium or lorazepam. *Journal of clinical psychopharmacology*. 1999;19(6):500-5.
16. Chou JCY, Czobor P, Dacpano G, Richardson N, Tuma I, Trujillo M, et al. Haloperidol blood levels in acute mania with psychosis. *Journal of Clinical Psychopharmacology*. 2001;21(4):445-7.
17. Chouinard G, Annable L, Turnier L, Holobow N, Szkrumelak N. A double-blind randomized clinical trial of rapid tranquilization with I.M. clonazepam and I.M. haloperidol in agitated psychotic patients with manic symptoms. *Canadian Journal of Psychiatry*. 1993;38(SUPPL. 4):S114-S21.

18. Chouinard G, Young SN, Annable L. Antimanic effect of clonazepam. *Biological psychiatry*. 1983;18(4):451-66.
19. Conus P, Berk M, Cotton SM, Kader L, Macneil C, Hasty MK, et al. Olanzapine or chlorpromazine plus lithium in first episode psychotic mania: An 8-week randomised controlled trial. *European psychiatry : the journal of the Association of European Psychiatrists*. 2015;30(8):975-82.
20. Conus P, Cotton S, Kader L, Macneil CA, Hasty M, Hallam KT, et al. Randomized controlled trial of olanzapine or chlorpromazine as addition to lithium in the treatment of a first manic episode with psychotic features: An 8-week, flexible dose, single-blind trial. *Bipolar Disorders*. 2009;11(7):779.
21. Cosgrove VE, Allende S, Gwizdowski I, Grace Fischer E, Ostacher M, Suppes T. A pilot trial of quetiapine, lithium, or placebo added to divalproex sodium for hypomanic or manic episodes in ambulatory adults with bipolar I disorder. *International Journal of Bipolar Disorders*. 2022;10(1).
22. Csehi R, Barabassy A, Kiss B, Dombi ZB, Sebe B, Laszlovszky I, et al. P.0676 Efficacy of cariprazine in bipolar I disorder in light of its receptor profile. *European Neuropsychopharmacology*. 2021;53:S495-S6.
23. Dauphinais D, Knable M, Rosenthal J, Polanski M, Rosenthal N. Zonisamide for bipolar disorder, mania or mixed states: a randomized, double blind, placebo-controlled adjunctive trial. *Psychopharmacology bulletin*. 2011;44(1):5-17.
24. Eden Evins A, Demopulos C, Nierenberg A, Culhane MA, Eisner L, Sachs G. A double-blind, placebo-controlled trial of adjunctive donepezil in treatment-resistant mania. *Bipolar Disorders*. 2006;8(1):75-80.
25. Gao K, Goto T, Yuan C, Brownrigg B, Conroy C, Chan PK, et al. A Pilot Study of the Effectiveness of Lithium Versus Quetiapine Immediate Release Monotherapy in Patients With Bipolar Spectrum Disorders. *Journal of clinical psychopharmacology*. 2018;38(5):422-34.
26. Garriga M, Sole E, Gonzalez-Pinto A, Selva-Vera G, Arranz B, Amann BL, et al. Efficacy of quetiapine XR vs. placebo as concomitant treatment to mood stabilizers in the control of subthreshold symptoms of bipolar disorder: Results from a pilot, randomized controlled trial. *European neuropsychopharmacology : the journal of the European College of Neuropsychopharmacology*. 2017;27(10):959-69.
27. Higuchi T, Kato T, Miyajima M, Watabe K, Masuda T, Hagi K, et al. Lurasidone in the long-term treatment of Japanese patients with bipolar I disorder: a 52-week open label study. *International Journal of Bipolar Disorders*. 2021;9(1).

28. Hirschfeld RMA, Eerdekens M, Kalali AH, Canuso CM, Khan AA, Karcher K, et al. An open-label extension trial of risperidone monotherapy in the treatment of bipolar I disorder. *International clinical psychopharmacology*. 2006;21(1):11-20.
29. Houston JP. 'Olanzapine-divalproex combination versus divalproex monotherapy in the treatment of bipolar mixed episodes: A double-blind, placebo-controlled study': Correction. *The Journal of Clinical Psychiatry*. 2011;72(8):1157-.
30. Houston JP, Ahl J, Meyers AL, Kaiser CJ, Tohen M, Baldessarini RJ. Reduced suicidal ideation in bipolar I disorder mixed-episode patients in a placebo-controlled trial of olanzapine combined with lithium or divalproex. *The Journal of clinical psychiatry*. 2006;67(8):1246-52.
31. Houston JP, Gatz JL, Degenhardt EK, Jamal HH. Symptoms predicting remission after divalproex augmentation with olanzapine in partially nonresponsive patients experiencing mixed bipolar I episode: a post-hoc analysis of a randomized controlled study. *BMC research notes*. 2010;3:276.
32. Houston JP, Ketter TA, Case M, Bowden C, Degenhardt EK, Jamal HH, et al. Early symptom change and prediction of subsequent remission with olanzapine augmentation in divalproex-resistant bipolar mixed episodes. *Journal of psychiatric research*. 2011;45(2):169-73.
33. Houston JP, Tohen M, Degenhardt EK, Jamal HH, Liu LL, Ketter TA. Olanzapine-divalproex combination versus divalproex monotherapy in the treatment of bipolar mixed episodes: a double-blind, placebo-controlled study. *Journal of clinical psychiatry*. 2009;70(11):1540-7.
34. Houston JP, Tohen M, Degenhardt EK, Jamal HH, Liu LLL, Ketter TA. 'Olanzapine-divalproex combination versus divalproex monotherapy in the treatment of bipolar mixed episodes: A double-blind, placebo-controlled study': Correction. *The Journal of Clinical Psychiatry*. 2010;71(1):93-.
35. Jeong H-G, Lee M-S, Ko Y-H, Han C, Jung I-K. Combination treatment with aripiprazole and valproic acid for acute mania: an 8-week, single-blind, randomized controlled trial. *Clinical neuropharmacology*. 2012;35(3):97-102.
36. Kader L, Conus P, Berk M, Cotton S, Macneil C, Hasty M, et al. Randomized controlled trial of olanzapine or chlorpromazine as addition to lithium in the treatment of a first manic episode with psychotic features: An 8 weeks, flexible dose, single blind trial. *Early Intervention in Psychiatry*. 2010;4:20.
37. Keck Jr PE, Calabrese JR, McQuade RD, Carson WH, Carlson BX, Rollin LM, et al. A randomized, double-blind, placebo-controlled 26-week trial of

- aripiprazole in recently manic patients with bipolar I disorder. *Journal of Clinical Psychiatry*. 2006;67(4):626-37.
38. Keck PE, Jr., Versiani M, Warrington L, Loebel AD, Horne RL. Long-term safety and efficacy of ziprasidone in subpopulations of patients with bipolar mania. *The Journal of clinical psychiatry*. 2009;70(6):844-51.
39. Kemp DE, Johnson E, Wang WV, Tohen M, Calabrese JR. Clinical utility of early improvement to predict response or remission in acute mania: focus on olanzapine and risperidone. *The Journal of clinical psychiatry*. 2011;72(9):1236-41.
40. Ketter TA, Agid O, Kapur S, Loebel A, Siu CO, Romano SJ. Rapid antipsychotic response with ziprasidone predicts subsequent acute manic/mixed episode remission. *Journal of psychiatric research*. 2010;44(1):8-14.
41. Ketter TA, Durgam S, Landbloom R, Mackle M, Wu X, Mathews M. Long-term safety and tolerability of asenapine: A double-blind, uncontrolled, long-term extension trial in adults with an acute manic or mixed episode associated with bipolar I disorder. *Journal of affective disorders*. 2017;207:384-92.
42. Ketter TA, Houston JP, Adams DH, Risser RC, Meyers AL, Williamson DJ, et al. Differential efficacy of olanzapine and lithium in preventing manic or mixed recurrence in patients with bipolar I disorder based on number of previous manic or mixed episodes. *The Journal of clinical psychiatry*. 2006;67(1):95-101.
43. Ketter TA, McIntyre RS, Earley W, Durgam S, Yu SY, Wu X, et al. Efficacy of asenapine in manic and depressive symptoms during maintenance therapy in adults with bipolar I disorder. *Bipolar Disorders*. 2017;19:149.
44. Kwentus J, Riesenberger RA, Marandi M, Manning RA, Allen MH, Fishman RS, et al. Rapid acute treatment of agitation in patients with bipolar I disorder: a multicenter, randomized, placebo-controlled clinical trial with inhaled loxapine. *Bipolar disorders*. 2012;14(1):31-40.
45. Lenox RH, Newhouse PA, Creelman WL, Whitaker TM. Adjunctive treatment of manic agitation with lorazepam versus haloperidol: a double-blind study. *The Journal of clinical psychiatry*. 1992;53(2):47-52.
46. Lindenmayer J-P, Bossie CA, Kujawa M, Zhu Y, Canuso CM. Dimensions of psychosis in patients with bipolar mania as measured by the positive and negative syndrome scale. *Psychopathology*. 2008;41(4):264-70.

47. Macfadden W, Adler CM, Turkoz I, Haskins JT, Turner N, Alphs L. Adjunctive long-acting risperidone in patients with bipolar disorder who relapse frequently and have active mood symptoms. *BMC psychiatry*. 2011;11:171.
48. Mahajan V, Arora M, Tandon VR, Gillani Z, Praharaj SK. Efficacy and Safety of Asenapine Versus Olanzapine in Combination With Divalproex for Acute Mania: A Randomized Controlled Trial. *Journal of clinical psychopharmacology*. 2019;39(4):305-11.
49. Marcus R. Aripiprazole improved time to any mood episode when added to mood stabilizer. *Psychiatric Annals*. 2011;41(7):353-.
50. Marcus R, Khan A, Rollin L, Morris B, Timko K, Carson W, et al. Efficacy of aripiprazole adjunctive to lithium or valproate in the long-term treatment of patients with bipolar I disorder with an inadequate response to lithium or valproate monotherapy: a multicenter, double-blind, randomized study. *Bipolar disorders*. 2011;13(2):133-44.
51. McElroy SL, Martens BE, Winstanley EL, Creech R, Malhotra S, Keck PE, Jr. Placebo-controlled study of quetiapine monotherapy in ambulatory bipolar spectrum disorder with moderate-to-severe hypomania or mild mania. *Journal of affective disorders*. 2010;124(1-2):157-63.
52. McIntyre RS, Calabrese J, Szegedi A, Panagides J. Asenapine in bipolar disorder: an overview of clinical trials in the olympia program. *Bipolar disorders*. 2010;12:36-7.
53. McIntyre RS, Cohen M, Zhao J, Alphs L, Macek TA, Panagides J. Asenapine versus olanzapine in acute mania: a double-blind extension study. *Bipolar disorders*. 2009;11(8):815-26.
54. McIntyre RS, Cohen M, Zhao J, Alphs L, Macek TA, Panagides J. Asenapine for long-term treatment of bipolar disorder: a double-blind 40-week extension study. *Journal of affective disorders*. 2010;126(3):358-65.
55. Meehan K, Zhang F, David S, Tohen M, Janicak P, Small J, et al. A double-blind, randomized comparison of the efficacy and safety of intramuscular injections of olanzapine, lorazepam, or placebo in treating acutely agitated patients diagnosed with bipolar mania. *Journal of clinical psychopharmacology*. 2001;21(4):389-97.
56. Missio G, Moreno DH, Fernandes F, Bio DS, Soeiro-de-Souza MG, Rodrigues dos Santos D, Jr., et al. The ARIQUELI study: potentiation of quetiapine in



bipolar I nonresponders with lithium versus aripiprazole. *Trials*. 2013;14:190.

57. Müller-Oerlinghausen B, Retzow A, Henn FA, Giedke H, Walden J. Valproate as an adjunct to neuroleptic medication for the treatment of acute episodes of mania: A prospective, randomized, double-blind, placebo-controlled, multicenter study. *Journal of Clinical Psychopharmacology*. 2000;20(2):195-203.
58. Nierenberg AA, McElroy SL, Friedman ES, Ketter TA, Shelton RC, Deckersbach T, et al. Bipolar CHOICE (Clinical Health Outcomes Initiative in Comparative Effectiveness): a pragmatic 6-month trial of lithium versus quetiapine for bipolar disorder. *The Journal of clinical psychiatry*. 2016;77(1):90-9.
59. Ouyang W-C, Hsu M-C, Yeh IN, Kuo C-C. Efficacy and safety of combination of risperidone and haloperidol with divalproate in patients with acute mania. *International journal of psychiatry in clinical practice*. 2012;16(3):178-88.
60. Pacchiarotti I, Pappadopulos E, Mandel F, Lombardo I, Loebel A, Vieta E. Differential response to treatment across countries in a randomized clinical trial in mania. *International clinical psychopharmacology*. 2011;26:e5-e6.
61. Revicki DA, Paramore LC, Sommerville KW, Swann AC, Zajecka JM, Depakote Comparator Study G. Divalproex sodium versus olanzapine in the treatment of acute mania in bipolar disorder: health-related quality of life and medical cost outcomes. *The Journal of clinical psychiatry*. 2003;64(3):288-94.
62. Sachs G, Chengappa KNR, Suppes T, Mullen JA, Brecher M, Devine NA, et al. Quetiapine with lithium or divalproex for the treatment of bipolar mania: a randomized, double-blind, placebo-controlled study. *Bipolar disorders*. 2004;6(3):213-23.
63. Sachs GS, Gardner-Schuster EE. Adjunctive treatment of acute mania: a clinical overview. *Acta psychiatrica Scandinavica Supplementum*. 2007(434):27-34.
64. Sachs GS, Gaulin BD, Gutierrez-Esteinou R, McQuade RD, Pikalov A, 3rd, Pultz JA, et al. Antimanic response to aripiprazole in bipolar I disorder patients is independent of the agitation level at baseline. *The Journal of clinical psychiatry*. 2007;68(9):1377-83.
65. Sachs GS, Grossman F, Ghaemi SN, Okamoto A, Bowden CL. Combination of a mood stabilizer with risperidone or haloperidol for treatment of acute mania: a double-blind, placebo-controlled comparison of efficacy and safety. *The American journal of psychiatry*. 2002;159(7):1146-54.
66. Sachs GS, Vanderburg DG, Edman S, Karayal ON, Kolluri S, Bachinsky M, et al. Adjunctive oral ziprasidone in patients with acute mania treated with lithium

- or divalproex, part 2: influence of protocol-specific eligibility criteria on signal detection. *The Journal of clinical psychiatry*. 2012;73(11):1420-5.
67. Sachs GS, Vanderburg DG, Karaya ON, Kolluri S, Bachinsky M, Cavus I. Adjunctive oral ziprasidone in patients with acute mania treated with lithium or divalproex, part 1: results of a randomized, double-blind, placebo-controlled trial. *The Journal of clinical psychiatry*. 2012;73(11):1412-9.
68. Sahraian A, Ehsaei Z, Mowla A. Aripiprazole as an adjuvant treatment for obsessive and compulsive symptoms in manic phase of bipolar disorder: A randomized, double-blind, placebo-controlled clinical trial. *Progress in neuro-psychopharmacology & biological psychiatry*. 2018;84(Pt A):267-71.
69. Sahraian A, Ghahremanpouri B, Mowla A. Is quetiapine effective for obsessive and compulsive symptoms in patients with bipolar disorder? A randomized, double-blind, placebo-controlled clinical trial. *CNS Spectrums*. 2021.
70. Samiei M, Sepehrifar Z, Daneshmand R, Sadighi G. Comparison of adjunctive quetiapine versus adjunctive haloperidol in combination with sodium valproate for treatment of patients with mania or mixed feature bipolar i disorder: A randomized double-blind clinical trial study. *Iranian Journal of Psychiatry and Behavioral Sciences*. 2021;15(2).
71. San L, Estrada G, Oudovenko N, Montanes F, Dobrovolskaya N, Bukhanovskaya O, et al. PLACID study: A randomized trial comparing the efficacy and safety of inhaled loxapine versus intramuscular aripiprazole in acutely agitated patients with schizophrenia or bipolar disorder. *European neuropsychopharmacology : the journal of the European College of Neuropsychopharmacology*. 2018;28(6):710-8.
72. Sanger TM, Grundy SL, Gibson PJ, Namjoshi MA, Greaney MG, Tohen MF. Long-term olanzapine therapy in the treatment of bipolar I disorder: an open-label continuation phase study. *The Journal of clinical psychiatry*. 2001;62(4):273-81.
73. Sanger TM, Tohen M, Vieta E, Dunner DL, Bowden CL, Calabrese JR, et al. Olanzapine in the acute treatment of bipolar I disorder with a history of rapid cycling. *Journal of affective disorders*. 2003;73(1-2):155-61.
74. Schaffer CB, Schaffer LC, Nordahl TE, Stark NM, Gohring CE. An Open Trial of Lurasidone as an Acute and Maintenance Adjunctive Treatment for Outpatients With Treatment-Resistant Bipolar Disorder. *Journal of clinical psychopharmacology*. 2016;36(1):88-9.
75. Smith LT, Shelton CL, Berk M, Hasty MK, Cotton SM, Henry L, et al. The impact of insight in a first-episode mania with psychosis population on outcome at

- 18 months. *Journal of affective disorders*. 2014;167:74-9.
76. Srivastava S, Wang PW, Hill SJ, Childers ME, Keller KL, Ketter TA. Pilot study of the efficacy of double-blind, placebo-controlled one-week olanzapine stabilization therapy in heterogeneous symptomatic bipolar disorder patients. *Journal of psychiatric research*. 2012;46(7):920-6.
77. Suppes T, Kelly D, Hynan L, Snow D, Sureddi S, Foster B, et al. Comparison of two anticonvulsants in a randomized, single-blind treatment of hypomanic symptoms in patients with bipolar disorder. *Australian and New Zealand Journal of Psychiatry*. 2007;41(5):397-402.
78. Suppes T, Ketter T. A double-blind, placebo-controlled trial of quetiapine for the treatment of mixed hypomania in bipolar II patients. *Neuropsychopharmacology*. 2010;35:S168.
79. Suppes T, Ketter TA, Gwizdowski IS, Dennehy EB, Hill SJ, Fischer EG, et al. First controlled treatment trial of bipolar II hypomania with mixed symptoms: quetiapine versus placebo. *Journal of affective disorders*. 2013;150(1):37-43.
80. Suppes T, Webb A, Paul B, Carmody T, Kraemer H, Rush AJ. Clinical outcome in a randomized 1-year trial of clozapine versus treatment as usual for patients with treatment-resistant illness and a history of mania. *The American journal of psychiatry*. 1999;156(8):1164-9.
81. Sussman N, Mullen J, Paulsson B, Vagero M. Rates of remission/euthymia with quetiapine in combination with lithium/divalproex for the treatment of acute mania. *Journal of affective disorders*. 2007;100 Suppl 1:S55-63.
82. Szegedi A, Calabrese JR, Stet L, MacKle M, Zhao J, Panagides J. Asenapine as adjunctive treatment for acute mania associated with bipolar disorder: Results of a 12-week core study and 40-week extension. *Journal of Clinical Psychopharmacology*. 2012;32(1):46-55.
83. Tamayo JM, Mazzotti G, Tohen M, Gattaz WF, Zapata R, Castillo JJ, et al. Outcomes for Latin American versus White patients suffering from acute mania in a randomized, double-blind trial comparing olanzapine and haloperidol. *Journal of clinical psychopharmacology*. 2007;27(2):126-34.
84. Thomas P, Vieta E. Amisulpride plus valproate vs haloperidol plus valproate in the treatment of acute mania of bipolar I patients: A multicenter, open-label, randomized, comparative trial. *Wiadomosci Psychiatryczne*. 2008;11(3):222-35.

85. Thomas P, Vieta E, group Ss. Amisulpride plus valproate vs haloperidol plus valproate in the treatment of acute mania of bipolar I patients: a multicenter, open-label, randomized, comparative trial. *Neuropsychiatric disease and treatment*. 2008;4(3):675-86.
86. Thompson MJ. 'Continuation of quetiapine versus switching to placebo or lithium for maintenance treatment of bipolar 1 disorder (trial 144: A randomized controlled study': Correction. *The Journal of Clinical Psychiatry*. 2014;75(3):290-.
87. Tohen M, Bowden CL, Smulevich AB, Bergstrom R, Quinlan T, Osuntokun O, et al. Olanzapine plus carbamazepine v. carbamazepine alone in treating manic episodes. *The British journal of psychiatry : the journal of mental science*. 2008;192(2):135-43.
88. Tohen M, Chengappa KNR, Suppes T, Zarate CA, Jr., Calabrese JR, Bowden CL, et al. Efficacy of olanzapine in combination with valproate or lithium in the treatment of mania in patients partially nonresponsive to valproate or lithium monotherapy. *Archives of general psychiatry*. 2002;59(1):62-9.
89. Tohen M, Roy Chengappa KN, Suppes T, Zarate Jr CA, Calabrese JR, Bowden CL, et al. Efficacy of olanzapine in combination with valproate or lithium in the treatment of mania in patients partially nonresponsive to valproate or lithium monotherapy. *Archives of General Psychiatry*. 2002;59(1):62-9.
90. Tohen M, Zhang F, Keck PE, Feldman PD, Risser RC, Tran PV, et al. Olanzapine versus haloperidol in schizoaffective disorder, bipolar type. *Journal of affective disorders*. 2001;67(1-3):133-40.
91. Torrent C, Martinez-Aran A, Daban C, Amann B, Balanza V, Comes M, et al. Effects of atypical antipsychotics on neurocognition in euthymic bipolar patients. *Bipolar Disorders*. 2010;12:54.
92. Torrent C, Martinez-Aran A, Daban C, Amann B, Balanza-Martinez V, del Mar Bonnin C, et al. Effects of atypical antipsychotics on neurocognition in euthymic bipolar patients. *Comprehensive psychiatry*. 2011;52(6):613-22.
93. Vieta E, Baker RA, Madera JJ, Zhang P, Such P, Chen M, et al. 47 Sustained Functional Recovery and Symptom Remission After Maintenance Treatment with Aripiprazole Once-Monthly for Patients with Bipolar I Disorder. *CNS spectrums*. 2019;24(1):201-2.
94. Vieta E, Bowden C, Ice KS, Schwartz JH, Wang P, Versavel M, et al. A 6-month, double-blind trial of ziprasidone plus a mood stabilizer in subjects with

bipolar I disorder. *European neuropsychopharmacology*. 2009;19:S497-S8.

95. Vieta E, Brague E, Goikolea JM, Sanchez-Moreno J, Reinares M, Comes M, et al. Acute and continuation risperidone monotherapy in mania. *Human psychopharmacology*. 2004;19(1):41-5.
96. Vieta E, Owen R, Baudalet C, McQuade RD, Sanchez R, Marcus RN. Assessment of safety, tolerability and effectiveness of adjunctive aripiprazole to lithium/valproate in bipolar mania: a 46-week, open-label extension following a 6-week double-blind study. *Current medical research and opinion*. 2010;26(6):1485-96.
97. Vieta E, Suppes T, Ekholm B, Udd M, Gustafsson U. Long-term efficacy of quetiapine in combination with lithium or divalproex on mixed symptoms in bipolar I disorder. *Journal of affective disorders*. 2012;142(1-3):36-44.
98. Vieta E, T'Joel C, McQuade RD, Carson Jr WH, Marcus RN, Sanchez R, et al. Efficacy of adjunctive aripiprazole to either valproate or lithium in bipolar mania patients partially nonresponsive to valproate/lithium monotherapy: A placebo-controlled study. *American Journal of Psychiatry*. 2008;165(10):1316-25.
99. Vieta E, Gasto C, Colom F, Reinares M, Martinez-Aran A, Benabarre A, et al. Role of risperidone in bipolar II: an open 6-month study. *Journal of affective disorders*. 2001;67(1-3):213-9.
100. Vieta E, Goldberg JF, Mullen J, Vagero M, Paulsson B. Quetiapine in the treatment of acute mania: target dose for efficacious treatment. *Journal of affective disorders*. 2007;100 Suppl 1:S23-31.
101. Vieta E, Herraiz M, Parramon G, Goikolea JM, Fernandez A, Benabarre A. Risperidone in the treatment of mania: efficacy and safety results from a large, multicentre, open study in Spain. *Journal of affective disorders*. 2002;72(1):15-9.
102. Yang FD, Juan L, Chen DC, Bian QT, Yao FX, Shang L, et al. A random, blinded and controlled trial for evaluating the efficacy and safety of olanzapine and lithium in the treatment of bipolar or mixed type mania. *Chinese Journal of New Drugs*. 2008;17(1):67-70.

103. Wang Z, Kemp DE, Chan PK, Fang Y, Ganocy SJ, Calabrese JR, et al. Comparisons of the tolerability and sensitivity of quetiapine-XR in the acute treatment of schizophrenia, bipolar mania, bipolar depression, major depressive disorder, and generalized anxiety disorder. *The international journal of neuropsychopharmacology*. 2011;14(1):131-42.
104. Yatham LN, Beaulieu S, Schaffer A, Kauer-Sant'Anna M, Kapczinski F, Lafer B, et al. Optimal duration of risperidone or olanzapine adjunctive therapy to mood stabilizer following remission of a manic episode: A CANMAT randomized double-blind trial. *Molecular psychiatry*. 2016;21(8):1050-6.
105. Yatham LN, Binder C, Riccardelli R, Leblanc J, Connolly M, Kusumakar V, et al. Risperidone in acute and continuation treatment of mania. *International clinical psychopharmacology*. 2003;18(4):227-35.
106. Yatham LN, Fallu A, Binder CE. A 6-month randomized open-label comparison of continuation of oral atypical antipsychotic therapy or switch to long acting injectable risperidone in patients with bipolar disorder. *Acta psychiatrica Scandinavica Supplementum*. 2007(434):50-6.
107. Yatham LN, Grossman F, Augustyns I, Vieta E, Ravindran A. Mood stabilisers plus risperidone or placebo in the treatment of acute mania. *International, double-blind, randomised controlled trial. The British journal of psychiatry : the journal of mental science*. 2003;182:141-7.
108. Yatham LN, Paulsson B, Mullen J, Vagero, Marten. Quetiapine versus placebo in combination with lithium or divalproex for the treatment of bipolar mania. *Journal of clinical psychopharmacology*. 2004;24(6):599-606.
109. Yatham LN, Vieta E, Young AH, Moller H-J, Paulsson B, Vagero M. A double blind, randomized, placebo-controlled trial of quetiapine as an add-on therapy to lithium or divalproex for the treatment of bipolar mania. *International clinical psychopharmacology*. 2007;22(4):212-20.
110. Ying YF, Xu SQ, Liu XX, Ye JH, Cao J. Clinical controlled study on quetiapine and clozapine combined with lithium in patients with mania. *Chinese Pharmaceutical Journal*. 2007;42(11):877-8.
111. Zimbroff DL, Marcus RN, Manos G, Stock E, McQuade RD, Auby P, et al. Management of acute agitation in patients with bipolar disorder: efficacy and safety of intramuscular aripiprazole. *Journal of clinical psychopharmacology*. 2007;27(2):171-6.
112. Talaei A, Dastgheib MS, Soltanifar A, Mokhber N, Akhondzadeh S, Afzaljavan F. Oxcarbazepine versus sodium valproate in treatment of acute mania: A

double-blind randomized clinical trial. *International Clinical Psychopharmacology*. 2022;37(3):116-21

113. Hasty MK, Macneil CA, Cotton SM, Berk M, Kader L, Ratheesh A, et al. Personality disorder among youth with first episode psychotic mania: An important target for specific treatment? *Early Intervention in Psychiatry*. 2022;16(3):256-63.
114. Findling RL, Atkinson S, Bachinsky M, Raiter Y, Abreu P, Ianos C, et al. Efficacy, Safety, and Tolerability of Flexibly Dosed Ziprasidone in Children and Adolescents with Mania in Bipolar I Disorder: A Randomized Placebo-Controlled Replication Study. *Journal of Child and Adolescent Psychopharmacology*. 2022;32(3):143-52.
115. Cosgrove VE, Allende S, Gwizdowski I, Grace Fischer E, Ostacher M, Suppes T. A pilot trial of quetiapine, lithium, or placebo added to divalproex sodium for hypomanic or manic episodes in ambulatory adults with bipolar I disorder. *International Journal of Bipolar Disorders*. 2022;10(1).
116. Abedini T, Hosseini R, Ghannadi F, Moghaddam HS, Ardakani MRK, Talaei A, et al. Efficacy and safety of palmitoylethanolamide as an adjunctive treatment for acute mania: A randomized, double-blind, placebo-controlled trial. *Psychiatry and Clinical Neurosciences*. 2022.

#### **Duplicated database (n=27)**

1. Baker RW, Goldberg JF, Tohen M, Milton DR, Stauffer VL, Schuh LM. The impact of response to previous mood stabilizer therapy on response to olanzapine versus placebo for acute mania. *Bipolar disorders*. 2002;4(1):43-9.
2. Baker RW, Milton DR, Stauffer VL, Gelenberg A, Tohen M. Placebo-controlled trials do not find association of olanzapine with exacerbation of bipolar mania. *Journal of affective disorders*. 2003;73(1-2):147-53.
3. Baker RW, Tohen M, Fawcett J, Risser RC, Schuh LM, Brown E, et al. Acute dysphoric mania: treatment response to olanzapine versus placebo. *Journal of clinical psychopharmacology*. 2003;23(2):132-7.
4. Baldessarini RJ, Hennen J, Wilson M, Calabrese J, Chengappa R, Keck PE, Jr., et al. Olanzapine versus placebo in acute mania: treatment responses in subgroups. *Journal of clinical psychopharmacology*. 2003;23(4):370-6.

5. Chengappa KN, Baker RW, Shao L, Yatham LN, Tohen M, Gershon S, et al. Rates of response, euthymia and remission in two placebo-controlled olanzapine trials for bipolar mania. *Bipolar disorders*. 2003;5(1):1-5.
6. Chengappa KN, Tohen M, Levine J, Jacobs T, Thase ME, Sanger TM, et al. Response to placebo among bipolar I disorder patients experiencing their first manic episode. *Bipolar disorders*. 2000;2(4):332-5.
7. Chengappa KNR, Hennen J, Baldessarini RJ, Kupfer DJ, Yatham LN, Gershon S, et al. Recovery and functional outcomes following olanzapine treatment for bipolar I mania. *Bipolar disorders*. 2005;7(1):68-76.
8. Citrome L, Landbloom R, Chang C-T, Earley W. Effects of asenapine on agitation and hostility in adults with acute manic or mixed episodes associated with bipolar I disorder. *Neuropsychiatric disease and treatment*. 2017;13:2955-63.
9. Durgam S, Laszlovszky I, Lu K, Ruth A, DeBelle M, Zukin S. Categorical improvement across mania symptoms: pooled analyses of cariprazine phase II/III trials. *European neuropsychopharmacology*. 2015;25:S418-S9.
10. Earley W, Durgam S, Lu K, Ruth A, Nemeth G, Laszlovszky I, et al. Clinically relevant response and remission outcomes in cariprazine-treated patients with bipolar I disorder. *Journal of affective disorders*. 2018;226:239-44.
11. Katagiri H, Takita Y, Tohen M, Higuchi T, Kanba S, Takahashi M. Safety and efficacy of olanzapine monotherapy and olanzapine with a mood stabilizer in 18-week treatment of manic/mixed episodes for Japanese patients with bipolar I disorder. *Current medical research and opinion*. 2012;28(5):701-13.
12. Keck Jr PE, Zukin S, Ruth A. Efficacy of cariprazine on YMRS single items: a pooled analysis of 3 randomized, double-blind, placebo-controlled trials in bipolar Mania. *CNS spectrums*. 2013;18(6):336.
13. McIntyre RS, Cohen M, Zhao J, Alphs L, Macek TA, Panagides J. 'A 3-week, randomized, placebo-controlled trial of asenapine in the treatment of acute mania in bipolar mania and mixed states': Corrigendum. *Bipolar Disorders*. 2010;12(3):350-.
14. McIntyre RS, McElroy SL, Eudicone JM, Forbes RA, Carlson BX, Baker RA. A 52-week, double-blind evaluation of the metabolic effects of aripiprazole and lithium in bipolar I disorder. The primary care companion for CNS disorders. 2011;13(6).



15. McIntyre RS, Earley W, Chang CT, Patel M, Szatmári B, Saliu I. Impact of the number of lifetime episodes on cariprazine efficacy in patients with bipolar mania. *Bipolar Disorders*. 2017;19:148-9.
16. McIntyre RS, Masand PS, Earley W, Patel M. Cariprazine for the treatment of bipolar mania with mixed features: A post hoc pooled analysis of 3 trials. *Journal of affective disorders*. 2019;257:600-6.
17. Stahl S, Lombardo I, Loebel A, Mandel FS. Efficacy of ziprasidone in dysphoric mania: pooled analysis of two double-blind studies. *Journal of affective disorders*. 2010;122(1-2):39-45.
18. Suppes T, Eudicone J, McQuade R, Pikalov A, 3rd, Carlson B. Efficacy and safety of aripiprazole in subpopulations with acute manic or mixed episodes of bipolar I disorder. *Journal of affective disorders*. 2008;107(1-3):145-54.
19. Tohen M, Gold AK, Sylvia LG, Montana RE, McElroy SL, Thase ME, et al. Bipolar mixed features – Results from the comparative effectiveness for bipolar disorder (Bipolar CHOICE) study. *Journal of Affective Disorders*. 2017;217:183-9.
20. Tohen M, Jacobs TG, Grundy SL, McElroy SL, Banov MC, Janicak PG, et al. Efficacy of olanzapine in acute bipolar mania: A double-blind, placebo-controlled study. *Archives of General Psychiatry*. 2000;57(9):841-9.
21. Tohen M, Pikalov A, Mao Y, Tsai J, Loebel A, Tocco M. Efficacy of lurasidone in preventing recurrence of bipolar disorder: Results of a multistate outcome analysis of treatments (MOAT). *Bipolar Disorders*. 2018;20:137.
22. Tohen M, Jacobs TG, Grundy SL, McElroy SL, Banov MC, Janicak PG, et al. Efficacy of olanzapine in acute bipolar mania - A double-blind, placebo-controlled study. *Revista de Psiquiatria Clinica*. 2001;28(4):218.
23. Vieta E, Durgam S, Lu K, Ruth A, Debele M, Zukin S. Effect of cariprazine across the symptoms of mania in bipolar I disorder: Analyses of pooled data from phase II/III trials. *European neuropsychopharmacology : the journal of the European College of Neuropsychopharmacology*. 2015;25(11):1882-91.
24. Vieta E, Mullen J, Brecher M, Paulsson B, Jones M. Quetiapine monotherapy for mania associated with bipolar disorder: combined analysis of two

international, double-blind, randomised, placebo-controlled studies. *Current medical research and opinion*. 2005;21(6):923-34.

25. Yatham L, Earley W, Cheng-Tao C, Barabáßy Á. Efficacy of cariprazine in patients with bipolar i mania by baseline symptom severity: A pooled, post hoc analysis. *Bipolar Disorders*. 2017;19:149.
26. Yatham LN, Vieta E, McIntyre RS, Jain R, Earley WR, Patel M. 156 The Broad Efficacy of Cariprazine Across Symptoms in Patients with Bipolar I Disorder: post Hoc Analysis of Randomized, Placebo-Controlled Trials. *CNS spectrums*. 2020;25(2):300-.
27. Zukin S, Lu K, Ruth A, Debelle M, Durgam S, D'Souza I. Categorical improvement across mania symptoms: pooled analyses of cariprazine phase II/III trials. *Bipolar disorders*. 2015;17:89.

#### **Fixed dose or no dose reported (n=13)**

1. Barbini B, Scherillo P, Benedetti F, Crespi G, Colombo C, Smeraldi E. Response to clozapine in acute mania is more rapid than that of chlorpromazine. *International clinical psychopharmacology*. 1997;12(2):109-12.
2. Berk M, Ichim L, Brook S. Olanzapine compared to lithium in mania: a double-blind randomized controlled trial. *International clinical psychopharmacology*. 1999;14(6):339-43.
3. Berwaerts J, Xu H, Nuamah I, Lim P, Hough D. Evaluation of the efficacy and safety of paliperidone extended-release in the treatment of acute mania: a randomized, double-blind, dose-response study. *Journal of affective disorders*. 2012;136(1-2):e51-e60.
4. El-Mallakh RS, Marcus R, Baudalet C, McQuade R, Carson WH, Owen R. A 40-week double-blind aripiprazole versus lithium follow-up of a 12-week acute phase study (total 52 weeks) in bipolar I disorder. *Journal of affective disorders*. 2012;136(3):258-66.
5. Landbloom RL, Mackle M, Wu X, Kelly L, Snow-Adami L, McIntyre RS, et al. Asenapine: Efficacy and safety of 5 and 10mg bid in a 3-week, randomized, double-blind, placebo-controlled trial in adults with a manic or mixed episode associated with bipolar I disorder. *Journal of affective disorders*. 2016;190:103-10.
6. Licht RW, Bysted M, Christensen H. Fixed-dosed risperidone in mania: an open experimental trial. *International clinical psychopharmacology*.

2001;16(2):103-10.

7. McElroy SL, Keck PE, Stanton SP, Tugrul KC, Bennett JA, Strakowski SM. A randomized comparison of divalproex oral loading versus haloperidol in the initial treatment of acute psychotic mania. *The Journal of clinical psychiatry*. 1996;57(4):142-6.
8. McIntyre RS, Brecher M, Paulsson B, Huizar K, Mullen J. Quetiapine or haloperidol as monotherapy for bipolar mania--a 12-week, double-blind, randomised, parallel-group, placebo-controlled trial. *European neuropsychopharmacology : the journal of the European College of Neuropsychopharmacology*. 2005;15(5):573-85.
9. Moosavi SM, Ahmadi M, Monajemi MB. Risperidone versus risperidone plus sodium valproate for treatment of bipolar disorders: a randomized, double-blind clinical-trial. *Global journal of health science*. 2014;6(6):163-7.
10. Patkar AA, Pae C-U, Vohringer PA, Mauer S, Narasimhan M, Dalley S, et al. A 13-week, randomized double-blind, placebo-controlled, cross-over trial of ziprasidone in bipolar spectrum disorder. *Journal of clinical psychopharmacology*. 2015;35(3):319-23.
11. Segal J, Berk M, Brook S. Risperidone compared with both lithium and haloperidol in mania: a double-blind randomized controlled trial. *Clinical neuropharmacology*. 1998;21(3):176-80.
12. Weiser M, Levi L, Levine SZ, Bialer M, Shekh-Ahmad T, Matei V, et al. A randomized, double-blind, placebo- and risperidone-controlled study on valnoctamide for acute mania. *Bipolar disorders*. 2017;19(4):285-94.
13. Zarezadeh F, Arbabi M, Shamabadi A, Naderi S, Hasanzadeh A, Ostadpour M, et al. Levetiracetam adjunct to quetiapine for the acute manic phase of bipolar disorder: a randomized, double-blind and placebo-controlled clinical trial of efficacy, safety and tolerability. *International Clinical Psychopharmacology*. 2022;37(2):46-53.

#### **Not superior to placebo (n=1)**

1. Vieta E, Sachs G, Chang D, Hellsten J, Brewer C, Peters-Strickland T, et al. Two randomized, double-blind, placebo-controlled trials and one open-label, long-term trial of brexpiprazole for the acute treatment of bipolar mania. *Journal of psychopharmacology (Oxford, England)*. 2021;35(8):971-82.

**Unpublished clinical trials, which did not meet our inclusion criteria (n=12)**

1. Eutr CZ. A Phase 3, Randomized, Placebo-Controlled, Double-Blinded Trial Evaluating the Safety and Efficacy of Asenapine in Subjects Continuing Lithium or Valproic Acid/Divalproex Sodium for the Treatment of an Acute Manic or Mixed Episode.  
<https://trialssearchwho.int/Trial2.aspx?TrialID=EUCTR2004-003927-11-CZ>. 2005. => **no outcome of interest**
2. Nct. Short Term Rescue Study of Olanzapine. <https://clinicaltrials.gov/show/NCT00186017>. 2005.  
=> **no dose reported**
3. Nct. A Multicenter, Randomized, Double-blind, Placebo-controlled, Parallel Group-comparison Trial of Aripiprazole in the Treatment of Patients With Bipolar Disorder Experiencing a Manic or Mixed Episode. <https://clinicaltrials.gov/show/NCT00606281>. 2008. => **fixed dose**
4. Quetiapine Fumarate (Seroquel) as Mono-Therapy or Adjunct to Lithium in the Treatment of Patients with Acute Mania in Bipolar Disorder. <https://clinicaltrials.gov/show/NCT00672490> => **no dose reported**
5. Naturalistic Study, Comparison of Divalproex Extended Release (ER) and Quetiapine for Adults with Acute Mania or Mixed Episodes.  
<https://clinicaltrials.gov/show/NCT00397020> => **no dose reported**
6. Adult Bipolar Mania. <https://clinicaltrials.gov/show/NCT00931723> => **Duplicated database**
7. Quetiapine Sr as Adjunctive Treatment In Mixed States of Bipolar Disorder. <https://clinicaltrials.gov/show/NCT01195363> => **no dose reported**
8. Week Trial to Study the Safety of Asenapine When Added to Lithium or Valproate in the Treatment of Bipolar Disorder (A7501009)(P05786). <https://clinicaltrials.gov/show/NCT00145509> => **no outcome of interest**
9. Study to Evaluate the Efficacy and Safety of Aripiprazole Administered With Lithium or Valproate Over 12 Weeks in the Treatment of Mania in Bipolar I Disorder. <https://clinicaltrials.gov/show/NCT00665366> => **no outcome of interest**

10. A Multicenter, Investigative Study of the Safety and Efficacy of Extended Administration of Aripiprazole in Combination With Mood Stabilizer for the Treatment of Patients With Bipolar Disorder Experiencing a Manic or Mixed Episode. <https://clinicaltrials.gov/show/NCT00606320>=> **no outcome of interest**
11. Multicenter Investigative Study of the Safety and Efficacy of Long-term Administration of Aripiprazole in Combination With Mood Stabilizer for the Treatment of Patients With Bipolar Disorder Experiencing a Manic or Mixed Episode. <https://clinicaltrials.gov/show/NCT00606229>=> **no outcome of interest**
12. 3-week Study to Evaluate Efficacy and Safety of Ziprasidone with Either Lithium or Divalproex in Acutely Manic Subjects. <https://clinicaltrials.gov/show/NCT00312494>=> **no outcome of interest**

**Appendix 3.** Formula of Efficacy-adjusted weighted mean dose method for antipsychotic dose equivalence

Formula

$$\text{Log}((\text{WMD}_A/\text{WMD}_B)*W)=\text{SMD}_{\text{Drug A-Drug B}}$$

$$\text{Eq}=1/W$$

$\text{WMD}_A$  : weighted mean dose of drug A

$\text{WMD}_B$  : weighted mean dose of drug B

$\text{SMD}_{\text{Drug A-Drug B}}$ : the difference of drug A versus drug (positive value indicates that A is superior to B)

W: coefficient

Eq: the dose equivalence of drug A to drug B

Example: Haloperidol equivalent to 1 mg olanzapine (without significantly different efficacy)

$\text{Log}((10.15/14.89)*W)=0$  (because these two drug did not significantly differ in SMD, we set this value as zero)

$\text{Eq}=1/W=0.68$  (0.68 mg of haloperidol is equivalent to 1 mg of olanzapine)

Example: Risperidone equivalent to 1 mg olanzapine (without efficacy-adjusted)

$\text{Log}((4.72/14.89)*W)=0$  (without efficacy-adjusted)

$\text{Eq}=0.32$

$\text{Log}((4.72/14.89)*W)=0.22$  (with efficacy-adjusted; see League table (Figure 1))

$\text{Eq}=0.19$
