# Supplementary material for: Comparison of antipsychotic dose equivalents for acute bipolar mania and schizophrenia
Source: HighWire-hosted journal article supplement (doi:10.1136/bmjment-2022-300546), 2023-02-01
Supplement: bmjment-2022-300546supp003_data_supplement.pdf [file bmjment-2022-300546supp003_data_supplement.pdf]

**eTable 1.** The characteristics and demographics of the included studies

| Author Year, Country                               | Diagnosis, Structure Interview | Severity Threshold | Population, Age                                       | Study Design, Setting                                      | Duration | Intervention, Meain Daily dose of antipsychotics, Sample Size              | Age (Female, %)                                                   | Measurement | Baseline Severity                      |
|----------------------------------------------------|--------------------------------|--------------------|-------------------------------------------------------|------------------------------------------------------------|----------|----------------------------------------------------------------------------|-------------------------------------------------------------------|-------------|----------------------------------------|
| <sup>1</sup> Bourin 2014, International            | DSM-IV-TR, nil                 | YMRS ≥ 20          | Bipolar I disorder, manic or mixed episode, 18-65 y/o | Double-blind RCT, Inpatients and discharge with follow-up  | 6 weeks  | Quetiapine, 666.9 mg, 183<br>Quetiapine + Lithium, 623.1 mg, 173           | 38.8 ± 12.1 (33.9)<br>37.9 ± 12.7 (41.6)                          | YMRS        | 29.9<br>30.0                           |
| <sup>2</sup> Bowden 2005, USA                      | DSM-IV; nil                    | YMRS ≥ 20          | Bipolar I disorder, acute manic episode, ≥18 y/o      | Double-blind RCT, Inpatients                               | 3 weeks  | Quetiapine, 586.0 mg, 107<br>Lithium, 98<br>Placebo, 97                    | 38.0 (43.9)<br>41.3 (40.8)<br>38.8 (42.1)                         | YMRS        | 32.7<br>33.3<br>34.0                   |
| <sup>3</sup> Calabrese 2015, International         | DSM-IV-TR, nil                 | YMRS ≥ 20          | Bipolar I disorder, manic or mixed episode, 18-65 y/o | Double-blind RCT, Inpatients and discharge with follow-up  | 3 weeks  | Cariprazine, 4.8 mg, 167<br>Cariprazine, 9.1 mg, 169<br>Placebo, 161       | 43.1 ± 12.2 (46.1)<br>41.2 ± 11.3 (49.7)<br>41.5 ± 11.4 (44.7)    | YMRS        | 33.2 ± 5.6<br>32.9 ± 4.7<br>32.6 ± 5.8 |
| <sup>4</sup> Cutler 2011, USA                      | DSM-IV-TR, SCID                | YMRS ≥ 20          | Bipolar I disorder, manic or mixed episode, 18-65 y/o | Double-blind RCT, Inpatients                               | 3 weeks  | Quetiapine, (603.8 mg), 151<br>Placebo, 160                                | 41.3 ± 10.3 (38.3)<br>40.8 ± 10.7 (41.5)                          | YMRS        | 28.8 ± 5.4<br>28.4 ± 5.1               |
| <sup>5</sup> Durgam 2015, USA, Russia, India       | DSM-IV-TR, MINI                | YMRS ≥ 20          | Bipolar I disorder, manic or mixed episode, 18-65 y/o | Double-blind RCT, Inpatients and discharge with follow-up  | 3 weeks  | Cariprazine, 8.8 mg, 118<br>Placebo, 117                                   | 38.0 ± 10.3 (32.2)<br>38.7 ± 11.0 (34.7)                          | YMRS        | 30.6 ± 5.4<br>30.2 ± 5.4               |
| <sup>6</sup> Feifel 2011, USA                      | DSM-IV, nil                    | YMRS ≥ 17          | Bipolar I disorder, manic or mixed episode, 18-65 y/o | Single-blind RCT, Inpatients                               | 3 weeks  | Quetiapine, 800.0 mg, 15<br>Valproic acid, 13                              | 36.9 (46.7)<br>42.4 (38.5)                                        | YMRS        | 25.7 ± 4.3<br>29.3 ± 5.0               |
| <sup>7</sup> Garfinkel 1980, Canada                | Criteria of Feighner for mania | nil                | Bipolar I disorder, manic episode                     | Double-blind RCT, Inpatients                               | 3 weeks  | Haloperidol, 28.0 mg, 7<br>Lithium, 7<br>Haloperidol + Lithium, 24.2 mg, 7 | 37.0 ± 5.3 (42.9)<br>41.5 ± 5.8 (71.4)<br>37.0 ± 6.1 (57.1)       | TRAM        | 40.0 ± 5.4<br>41.2 ± 5.0<br>40.6 ± 5.1 |
| <sup>8</sup> Gopal 2005, India                     | DSM-IV, nil                    | YMRS ≥ 20          | Bipolar I disorder, manic or mixed episode, 18-65 y/o | Double-blind RCT, Inpatients and discharge with follow-up  | 3 weeks  | Risperidone, 5.6 mg, 146<br>Placebo, 145                                   | 34.7 ± 12.0 (32.0)<br>35.5 ± 12.3 (44.0)                          | YMRS        | 36.9 ± 8.0<br>37.4 ± 7.9               |
| <sup>9</sup> Hirschfeld 2004, USA                  | DSM-IV, nil                    | YMRS ≥ 20          | Bipolar I disorder, manic episode, ≥ 18 y/o           | Double-blind RCT, Inpatients                               | 3 weeks  | Risperidone, 4.1 mg, 127<br>Placebo, 119                                   | 38.1 ± 11.9 (47.0)<br>39.5 ± 12.2 (39.0)                          | YMRS        | 29.1 ± 5.1<br>29.2 ± 5.2               |
| <sup>10</sup> Kanba 2012, Asia                     | DSM-IV-TR, nil                 | YMRS ≥ 20          | Bipolar I disorder, manic or mixed episode, 18-64 y/o | Double-blind RCT, Inpatients and outpatients               | 3 weeks  | Aripiprazole, 22.9 mg, 128<br>Placebo, 130                                 | 37.5 ± 12.5 (57.4)<br>37.8 ± 12.7 (60.0)                          | YMRS        | 28.3 ± 6.0<br>28.0 ± 6.0               |
| <sup>11</sup> Katagiri 2012, Japan                 | DSM-IV-TR, MINI                | YMRS ≥ 20          | Bipolar I disorder, manic or mixed episode, ≥ 18 y/o  | Double-blind RCT, Inpatients and outpatients               | 3 weeks  | Olanzapine, 11.2 mg, 104<br>Haloperidol, 5.0 mg, 20<br>Placebo, 97         | 43.1 ± 12.0 (52.9)<br>49.3 ± 11.9 (45.0)<br>42.5 ± 10.9 (58.8)    | YMRS)       | 27.7 ± 5.9<br>26.6 ± 4.5<br>26.9 ± 5.6 |
| <sup>12</sup> Keck 2003 (Aripiprazole), USA        | DSM-IV, nil                    | YMRS ≥ 20          | Bipolar I disorder, manic or mixed episode, ≥18 y/o   | Double-blind RCT , Inpatients and discharge with follow-up | 3 weeks  | Aripiprazole, (27.9mg), 130<br>Placebo, 132                                | 40.5 ± 12.7 (55.0)<br>40.5 ± 11.8 (58.0)                          | YMRS        | 28.2 ± 6.1<br>29.7 ± 5.8               |
| <sup>13</sup> Keck 2003 (Ziprasidone), USA, Brazil | DSM-IV, SCID                   | SADS-MRS ≥ 14      | Bipolar I disorder, manic or mixed episode, ≥18 y/o   | Double-blind RCT, Inpatients                               | 3 weeks  | Ziprasidone, 130.1 mg, 140<br>Placebo, 70                                  | 39.0 ±10.6 (44.0)<br>37.0± 10.3 (49.0)                            | SADS-MRS    | 27.0 ± 3.8<br>26.7 ± 7.0               |
| <sup>14</sup> Keck 2009, USA                       | DSM-IV-TR MINI                 | YMRS ≥ 20          | Bipolar I disorder, manic or mixed episode, ≥ 18 y/o  | Double-blind RCT, Inpatients and discharge with follow-up  | 3 weeks  | Lithium, 155<br>Aripiprazole, 23.2 mg, 154<br>Placebo, 163                 | 39.6 ± 10.5 (49.0)<br>39.6 ± 10.6 (88.0)<br>39.8 ± 11.3 (48.0)    | YMRS        | 29.2 ± 5.0<br>28.5 ± 5.0<br>28.9 ± 5.1 |
| <sup>15</sup> Khanna 2005, India                   | DSM-IV, nil                    | YMRS ≥ 20          | Bipolar I disorder, manic or mixed episode, ≥18 y/o   | Double-blind RCT, Inpatients                               | 3 weeks  | Risperidone, 5.6 mg, 146<br>Placebo, 144                                   | 35.7 ± 12.1 (32.0)<br>34.5 ± 12.0 (44.0)                          | YMRS        | 37.1 ± 8.5<br>37.5 ± 8.4               |
| <sup>16</sup> Li 2008, China                       | DSM-IV, nil                    | YMRS ≥ 20          | Bipolar I disorder, manic episode, 18-65 y/o          | Double-blind RCT, Inpatients                               | 4 weeks  | Quetiapine, 648.2 mg, 77<br>Lithium, 77                                    | 32.7 ± 11.5 (57.1)<br>33.6 ± 11.4 (48.1)                          | YMRS        | 29.3 ± 5.8<br>29.8 ± 5.7               |
| <sup>17</sup> McIntyre 2005, South America         | DSM-IV, nil                    | YMRS ≥ 20          | Bipolar I disorder, manic episode, ≥ 18 y/o           | Double-blind RCT, Inpatients                               | 3 weeks  | Quetiapine 559 mg, 102<br>Haloperidol, 101<br>Placebo, 99                  | 42.8 (18-79) (63.4)<br>45.1 (18-76) (63.3)<br>40.6 (18-72) (63.0) | YMRS        |                                        |
| <sup>18</sup> McIntyre 2009, International         | DSM-IV-TR, MINI                | YMRS ≥ 20          | Bipolar I disorder, manic or mixed episode, ≥ 18 y/o  | Single-blind RCT, Inpatients                               | 3 weeks  | Olanzapine, 15.8 mg, 190<br>Asenapine, 18.2 mg, 194<br>Placebo, 104        | 40.1 ± 11.3 (40.0)<br>38.7 ± 11.9 (41.2)<br>39.4 ± 12.0 (50.0)    | YMRS        | 29.7 ± 6.6<br>29.4 ± 6.7<br>28.3 ± 6.3 |
| <sup>19</sup> McIntyre 2010, International         | DSM-IV-TR, MINI                | YMRS ≥ 20          | Bipolar I disorder, manic or mixed episode, ≥ 18 y/o  | Double-blind RCT, Inpatients and outpatients               | 3 weeks  | Olanzapine, 15.9 mg, 203<br>Asenapine, 18.4 mg, 183<br>Placebo, 94         | 38.4 ± 10.8 (42.9)<br>39.1 ± 12.3 (50.3)<br>38.1 ± 12.5 (51.0)    | YMRS        | 27.7 ± 5.9<br>26.6 ± 4.5<br>26.9 ± 5.6 |
| <sup>20</sup> Moreno 2007, Brazil                  | DSM-IV-SCID                    | YMRS ≥ 20          | Bipolar I disorder, acute manic episode, adult        | Double-blind RCT, Inpatients                               | 6 weeks  | Olanzapine, 13.6 mg, 7<br>Haloperidol, 5.8 mg, 5                           | 38.6 ± 14.2 (57.0)<br>39.2 ± 11.2 (100.0)                         | YMRS        | 30.6 ± 5.0<br>30.6 ± 8.6               |
| <sup>21</sup> Niufan 2008, China                   | DSM-IV, nil                    | YMRS ≥ 20          | Bipolar I disorder, manic or mixed episode ,18-50 y/o | Double-blind RCT, Inpatients and outpatients               | 4 weeks  | Olanzapine, 18.4 mg, 69<br>Lithium, 71                                     | 31.2 ± 12.6 (56.5)<br>34.0 ± 13.8 (49.3)                          | YMRS        | 34.0 ± 6.8<br>32.4 ± 7.2               |
| <sup>22</sup> Perlis 2006, USA                     | DSM-IV, nil                    | YMRS ≥ 20          | Bipolar I disorder, manic or mixed episode ,18-70 y/o | Inpatients                                                 | 3 weeks  | Olanzapine, 14.7 mg, 165<br>Risperidone, 3.9 mg, 164                       | 38.1 ± 11.1 (57.0)<br>37.7 ± 10.9 (52.4)                          | YMRS        | 26.6 ± 5.0<br>26.7 ± 5.0               |

|                                                        |                |                    |                                                                                 |                                                           |         |                                                                                        |                                                                |          |                                                                                  |
|--------------------------------------------------------|----------------|--------------------|---------------------------------------------------------------------------------|-----------------------------------------------------------|---------|----------------------------------------------------------------------------------------|----------------------------------------------------------------|----------|----------------------------------------------------------------------------------|
| <sup>23</sup> Potkin 2005, USA, Brazil, Maxico         | DSM-IV, SCID   | SADS-MRS ≥ 14      | Bipolar I disorder, manic or mixed episode, ≥18 y/o                             | Double-blind RCT, Inpatients                              | 3 weeks | Ziprasidone, 112.0 mg, 139<br>Placebo, 66                                              | 38.9 ±11.6 (51.1)<br>39.0 ± 11.5 (45.5)                        | SADS-MRS | 26.2 ± 7.2<br>26.4 ± 7.5                                                         |
| <sup>24</sup> Rezayat 2014, Iran                       | DSM-IV-TR      | nil                | Bipolar I disorder, acute manic episode                                         | Double-blind RCT, Inpatients                              | 4 weeks | Aripiprazole, 27.0 mg, 31<br>Risperidone, 6.0 mg, 31                                   | 34.0 ± 8.6 (50.0)<br>34.0 ± 9.1 (50.0)                         | YMRS     | 39.4 ± 6.8<br>39.7 ± 9.9                                                         |
| <sup>25</sup> Sachs 2006, USA                          | DSM-IV, nil    | YMRS ≥ 20          | Bipolar I disorder, manic or mixed episode, ≥ 18 y/o                            | Double-blind RCT, Inpatients and discharge with follow-up | 3 weeks | Aripiprazole, 27.3 mg, 137<br>Placebo, 135                                             | 40.4 ± 10.5 (50.0)<br>37.3 ± 10.5 (53.0)                       | YMRS     | 28.8 ± 4.9<br>28.5 ± 4.9                                                         |
| <sup>26</sup> Sachs 2015, USA, India                   | DSM-IV-TR, nil | YMRS ≥ 20          | Bipolar I disorder, manic or mixed episode ,18-65 y/o                           | Double-blind RCT, Inpatients and discharge with follow-up | 3 weeks | Cariprazine, 9.0 mg, 158<br>Placebo,154                                                | 35.8 ± 11.4 (33.5)<br>36.7 ± 11.8 (38.3)                       | YMRS     | 32.3 ± 5.8<br>32.1 ± 5.6                                                         |
| <sup>27</sup> Shafti 2010, Iran                        | DSM-IV-TR, nil | nil                | Bipolar I disorder, manic episode                                               | Double-blind RCT, Inpatients                              | 3 weeks | Olanzapine, 20.3 mg, 20<br>Lithium, 20                                                 | nil, (100.0)<br>nil, (100.0)                                   | MSRS     | Frequency<br>78.5 ± 12.6<br>77.1 ± 10.7<br>Intensity<br>80.3 ± 8.7<br>79.2 ± 9.6 |
| <sup>28</sup> Shafti 2018, Iran                        | DSM-IV-TR, nil | nil                | Bipolar I disorder, manic episode                                               | Double-blind RCT, Inpatients                              | 3 weeks | Aripiprazole, 25.8 mg, 15<br>Lithium, 15                                               | 30.7±10.4(0.0)<br>29.8±2.1(0.0)                                | MSRS     | Frequency<br>79.6±10.5<br>80.5±9.9<br>Intensity<br>79.3±9.8<br>82.2±10.3         |
| <sup>29</sup> Smulevich 2005, Russia                   | DSM-IV, nil    | YMRS ≥ 20          | Bipolar I disorder, manic episode ≥18 y/o                                       | Double-blind RCT, Inpatients                              | 3 weeks | Risperidone, 4.2 mg, 153<br>Placebo, 138<br>Haloperidol, 8.0 mg, 144                   | 41.3 ± 13.1 (46.1)<br>39.4 ± 13.0 (49.3)<br>38.5 ± 12.2 (45.8) | YMRS     | 32.1 ± 6.9<br>31.5 ± 6.7<br>31.3 ± 6.5                                           |
| <sup>30</sup> Tohen 1999, USA                          | DSM-IV, SCID   | YMRS ≥ 20          | Bipolar I disorder, manic or mixed episode, 18-65 y/o                           | Double-blind RCT, Inpatients                              | 3 weeks | Olanzapine, 14.9 mg, 70<br>Placebo, 69                                                 | 39.5 ± 11.0 (51.8)<br>39.5 ± 11.0 (51.8)                       | YMRS     | 28.7 ± 6.7<br>27.7 ± 6.5                                                         |
| <sup>31</sup> Tohen 2000, USA                          | DSM-IV, SCID-P | YMRS ≥ 20          | Bipolar I disorder, manic or mixed episode, 18-70 y/o                           | Double-blind RCT, Inpatients and outpatients              | 4 weeks | Olanzapine, 16.4 mg, 54<br>Placebo, 56                                                 | 38.3 ± 10.7 (50.9)<br>39.0 ± 10.1 (50.0)                       | YMRS     | 28.8 ± 6.7<br>29.4 ± 6.8                                                         |
| <sup>32</sup> Tohen 2002, USA                          | DSM-IV, SCID   | YMRS ≥ 20          | Bipolar I disorder, manic or mixed episode, 18-75 y/o                           | Double-blind RCT, Inpatients                              | 3 weeks | Olanzapine, 17.4 mg, 125<br>Valproic acid, 126                                         | 40.0 ± 12.0 (57.6)<br>41.1 ± 12.3 (57.1)                       | YMRS     | 27.4 ± 5.2<br>27.9 ± 6.6                                                         |
| <sup>33</sup> Tohen 2003, International                | DSM-IV, SCID   | YMRS ≥ 20          | Bipolar I disorder, manic or mixed episode, ≥ 18 y/o                            | Double-blind RCT, Inpatients and outpatients              | 6 weeks | Olanzapine, 15.0 mg, 219<br>Haloperidol, 7.1 mg, 234                                   | 41.0 ± 13.0 (63.2)<br>40.0 ± 13.0 (57.1)                       | YMRS     | 31.1±7.6<br>30.6±7.7                                                             |
| <sup>34</sup> Tohen 2008, USA                          | DSM-IV, SCID   | 30 ≥ SADS-MRS ≥ 20 | Bipolar I disorder, manic or mixed episode without psychotic feature, 18-65 y/o | Double-blind RCT, Inpatients and outpatients              | 3 weeks | Valproic acid, 201<br>Olanzapine, 11.4 mg, 215<br>Placebo, 105                         | 39.2 ± 11.7 (53.2)<br>39.5 ± 11.9 (54.2)<br>40.6 ± 12.8 (46.5) | YMRS     | 23.9 ± 2.8<br>23.8 ± 2.8<br>23.5 ± 2.5                                           |
| <sup>35</sup> Vieta 2005, International                | DSM-IV, nil    | YMRS ≥ 20          | Bipolar I disorder, manic or mixed episode, 18-65 y/o                           | Double-blind RCT, Inpatients and outpatients              | 3 weeks | Aripiprazole, 22.6 mg, 175<br>Haloperidol, 11.6 mg, 172                                | 42.6 ± 11.9 (56.6)<br>41.0 ± 11.8 (66.9)                       | YMRS     | 31.1 ± 6.6<br>31.5 ± 7.9                                                         |
| <sup>36</sup> Vieta 2010 (Paliperidone), International | DSM-IV, nil    | YMRS ≥ 20          | Bipolar I disorder, manic or mixed episode, ≥ 18 y/o                            | Double-blind RCT, Inpatients and discharge with follow-up | 3 weeks | Quetiapine, 600.0 mg, 192<br>Paliperidone, 9.0 mg, 190<br>Placebo, 104                 | 39.0 ± 11.0 (40.0)<br>40.0 ± 11.3 (42.0)<br>38.0 ± 10.0 (47.0) | YMRS     | 28.0 ± 5.1<br>27.0 ± 5.0<br>27.0 ± 5.0                                           |
| <sup>37</sup> Vieta 2010 (Ziprasidone) International   | DSM-IV, SCID   | SADS-MRS ≥ 14      | Bipolar I disorder, manic or mixed episode, ≥ 18 y/o                            | Double-blind RCT, Inpatients and discharge with follow-up | 3 weeks | Ziprasidone, 116.2 mg, 178<br>Haloperidol, 16.0 mg, 172<br>Placebo, 88                 | 38.5 ± 11.6 (39.3)<br>38.9 ± 12.2 (42.1)<br>36.9 ± 13.8 (43.2) | SADS-MRS |                                                                                  |
| <sup>38</sup> Vieta 2021, International                | DSM-5, MINI    | YMRS ≥ 24          | Bipolar I disorder, manic or mixed episode, 18-65 y/o                           | Double-blind RCT, Inpatients                              | 3 weeks | Brexpiprazole 3.21mg, 158<br>placebo, 164                                              | 43.4 ± 11.7 (50.6)<br>44.5 ± 11.2 (50.6)                       | YMRS     | 30.4 ± 4.7<br>30.5 ± 4.2                                                         |
| <sup>38</sup> Vieta 2021, International                | DSM-5, MINI    | YMRS ≥ 24          | Bipolar I disorder, manic or mixed episode, 18-65 y/o                           | Double-blind RCT, Inpatients                              | 3 weeks | Brexpiprazole 3.22mg, 163<br>placebo, 170                                              | 44.6 ± 10.7 (52.1)<br>44.3 ± 12.0 (48.2)                       | YMRS     | 30.7 ± 4.3<br>30.7 ± 4.0                                                         |
| <sup>39</sup> Xu 2015, China                           | DSM-IV, nil    | YMRS ≥ 17          | Bipolar I disorder, acute manic episode, 19-60 y/o                              | Double-blind RCT, Inpatients                              | 4 weeks | Valproic acid, 40<br>Olanzapine, 16.3 mg, 40<br>Valproic acid + Olanzapine, 13.1mg, 40 | 31.7 ± 8.2 (51.4)<br>30.9 ± 9.1 (51.3)<br>30.2 ± 7.8 (52.6)    | YMRS     | 34.4 ± 9.1<br>34.6 ± 7.0<br>34.3 ± 6.1                                           |
| <sup>40</sup> Young 2009, USA                          | DSM-IV-TR MINI | YMRS ≥ 20          | Bipolar I, manic or mixed episode, ≥ 18 y/o                                     | Double-blind RCT, Inpatients and discharge with follow-up | 3 weeks | Aripiprazole, 23.6 mg, 167<br>Haloperidol, 8.5 mg, 165<br>Placebo, 153                 | 40.5 (57.0)<br>41.6 (56.0)<br>40.2 (54.0)                      | YMRS     | 28.0 ± 5.8<br>27.6 ± 5.7<br>28.4 ± 5.9                                           |
| <sup>41</sup> Zajacka 2002, USA                        | DSM-IV-SADS    | SADS-MRS ≥ 25      | Bipolar I disorder, manic or mixed episode, ≥ 18 y/o                            | Double-blind RCT, Inpatients                              | 3 weeks | Olanzapine, 14.7mg, 57<br>Valproic acid, 63                                            | 38.1 ± 12.2 (47.0)<br>38.9 ± 12.1 (44.0)                       | SADS-MRS | 32.3<br>30.8                                                                     |

**Note:** DSM-III-R, IV, IV-TR, and 5: The Diagnostic and Statistical Manual of Mental Disorders 3<sup>rd</sup> revision, 4<sup>th</sup>, 4<sup>th</sup> text revision, and 5<sup>th</sup> edition; SADS: Schedule for Affective Disorders and Schizophrenia; KSADS: Schedule for Affective Disorders and Schizophrenia for School-Age Children; SADS-MRS: Schedule for Affective Disorders and Schizophrenia-Mania Rating Score; SCID: Structured Clinical Interview for DSM-IV Disorders; SCID-P: Structured Clinical Interview for DSM-IV Disorders, Patient version; MINI: Mini-International Neuropsychiatric Interview; YMRS: Young Mania Rating Scale; CGI-BP: Clinical Global Impressions-Bipolar Scale; TRAM: Treatment Response Assessment Method; MSRS: Manic State Rating Scale

1. Bourin MS, Severus E, Schronen JP, et al. Lithium as add-on to quetiapine XR in adult patients with acute mania: a 6-week, multicenter, double-blind, randomized, placebo-controlled study. *Int J Bipolar Disord*. 2014;2:14. Published 2014 Nov 8. doi:10.1186/s40345-014-0014-9
2. Bowden CL, Grunze H, Mullen J, et al. A randomized, double-blind, placebo-controlled efficacy and safety study of quetiapine or lithium as monotherapy for mania in bipolar disorder. *J Clin Psychiatry*. 2005;66(1):111-121. doi:10.4088/jcp.v66n0116
3. Calabrese JR, Keck PE Jr, Starace A, et al. Efficacy and safety of low- and high-dose cariprazine in acute and mixed mania associated with bipolar I disorder: a double-blind, placebo-controlled study. *J Clin Psychiatry*. 2015;76(3):284-292. doi:10.4088/JCP.14m09081
4. Cutler AJ, Datto C, Nordenhem A, Minkwitz M, Acevedo L, Darko D. Extended-release quetiapine as monotherapy for the treatment of adults with acute mania: a randomized, double-blind, 3-week trial. *Clin Ther*. 2011;33(11):1643-1658. doi:10.1016/j.clinthera.2011.10.002
5. Durgam S, Starace A, Li D, et al. The efficacy and tolerability of cariprazine in acute mania associated with bipolar I disorder: a phase II trial. *Bipolar Disord*. 2015;17(1):63-75. doi:10.1111/bdi.12238
6. Feifel D, Galangue B, Macdonald K, et al. A Naturalistic, Single-blind Comparison of Rapid Dose Administration of Divalproex ER Versus Quetiapine in Patients with Acute Bipolar Mania. *Innov Clin Neurosci*. 2011;8(1):29-35.
7. Garfinkel PE, Stancer HC, Persad E. A comparison of haloperidol, lithium carbonate and their combination in the treatment of mania. *J Affect Disord*. 1980;2(4):279-288. doi:10.1016/0165-0327(80)90029-4
8. Gopal S, Steffens DC, Kramer ML, Olsen MK. Symptomatic remission in patients with bipolar mania: results from a double-blind, placebo-controlled trial of risperidone monotherapy. *J Clin Psychiatry*. 2005;66(8):1016-1020. doi:10.4088/jcp.v66n0809
9. Hirschfeld RM, Keck PE Jr, Kramer M, et al. Rapid antimanic effect of risperidone monotherapy: a 3-week multicenter, double-blind, placebo-controlled trial. *Am J Psychiatry*. 2004;161(6):1057-1065. doi:10.1176/appi.ajp.161.6.1057
10. Kanba S, Kawasaki H, Ishigooka J, Sakamoto K, Kinoshita T, Kuroki T. A

placebo-controlled, double-blind study of the efficacy and safety of aripiprazole for the treatment of acute manic or mixed episodes in Asian patients with bipolar I disorder (the AMAZE study). *World J Biol Psychiatry*. 2014;15(2):113-121. doi:10.3109/15622975.2012.669047.

11. Katagiri H, Takita Y, Tohen M, Higuchi T, Kanba S, Takahashi M. Efficacy and safety of olanzapine in the treatment of Japanese patients with bipolar I disorder in a current manic or mixed episode: a randomized, double-blind, placebo- and haloperidol-controlled study. *J Affect Disord*. 2012;136(3):476-484. doi:10.1016/j.jad.2011.10.045
12. Keck PE Jr, Marcus R, Tourkodimitris S, et al. A placebo-controlled, double-blind study of the efficacy and safety of aripiprazole in patients with acute bipolar mania. *Am J Psychiatry*. 2003;160(9):1651-1658. doi:10.1176/appi.ajp.160.9.1651
13. Keck PE Jr, Versiani M, Potkin S, et al. Ziprasidone in the treatment of acute bipolar mania: a three-week, placebo-controlled, double-blind, randomized trial. *Am J Psychiatry*. 2003;160(4):741-748. doi:10.1176/appi.ajp.160.4.741
14. Keck PE, Orsulak PJ, Cutler AJ, et al. Aripiprazole monotherapy in the treatment of acute bipolar I mania: a randomized, double-blind, placebo- and lithium-controlled study. *J Affect Disord*. 2009;112(1-3):36-49. doi:10.1016/j.jad.2008.05.014
15. Khanna S, Vieta E, Lyons B, Grossman F, Eerdekens M, Kramer M. Risperidone in the treatment of acute mania: double-blind, placebo-controlled study. *Br J Psychiatry*. 2005;187:229-234. doi:10.1192/bjp.187.3.229
16. Li H, Ma C, Wang G, Zhu X, Peng M, Gu N. Response and remission rates in Chinese patients with bipolar mania treated for 4 weeks with either quetiapine or lithium: a randomized and double-blind study. *Curr Med Res Opin*. 2008;24(1):1-10. doi:10.1185/030079908x253933
17. McIntyre, R. S., Brecher, M., Paulsson, B., Huizar, K., & Mullen, J. (2005). Quetiapine or haloperidol as monotherapy for bipolar mania--a 12-week, double-blind, randomised, parallel-group, placebo-controlled trial. *European neuropsychopharmacology : the journal of the European College of Neuropsychopharmacology*, 15(5), 573–585. <https://doi.org/10.1016/j.euroneuro.2005.02.006>
18. McIntyre RS, Cohen M, Zhao J, Alphas L, Macek TA, Panagides J. A 3-week, randomized, placebo-controlled trial of asenapine in the treatment of acute mania in bipolar mania

- and mixed states [published correction appears in *Bipolar Disord.* 2010 May;12(3):350]. *Bipolar Disord.* 2009;11(7):673-686. doi:10.1111/j.1399-5618.2009.00748.x
19. McIntyre RS, Cohen M, Zhao J, Alphas L, Macek TA, Panagides J. Asenapine in the treatment of acute mania in bipolar I disorder: a randomized, double-blind, placebo-controlled trial. *J Affect Disord.* 2010;122(1-2):27-38. doi:10.1016/j.jad.2009.12.028
  20. Moreno RA, Hanna MM, Tavares SM, Wang YP. A double-blind comparison of the effect of the antipsychotics haloperidol and olanzapine on sleep in mania. *Braz J Med Biol Res.* 2007;40(3):357-366. doi:10.1590/s0100-879x2007000300011
  21. Niufan G, Tohen M, Qiuqing A, et al. Olanzapine versus lithium in the acute treatment of bipolar mania: a double-blind, randomized, controlled trial. *J Affect Disord.* 2008;105(1-3):101-108. doi:10.1016/j.jad.2007.04.020
  22. Perlis RH, Baker RW, Zarate CA Jr, et al. Olanzapine versus risperidone in the treatment of manic or mixed States in bipolar I disorder: a randomized, double-blind trial. *J Clin Psychiatry.* 2006;67(11):1747-1753. doi:10.4088/jcp.v67n1112
  23. Potkin SG, Keck PE Jr, Segal S, Ice K, English P. Ziprasidone in acute bipolar mania: a 21-day randomized, double-blind, placebo-controlled replication trial. *J Clin Psychopharmacol.* 2005;25(4):301-310. doi:10.1097/01.jcp.0000169068.34322.70
  24. Rezayat AA, Hebrani P, Behdani F, Salaran M, Marvast MN. Comparison the effectiveness of aripiprazole and risperidone for the treatment of acute bipolar mania. *J Res Med Sci.* 2014;19(8):733-738.
  25. Sachs G, Sanchez R, Marcus R, et al. Aripiprazole in the treatment of acute manic or mixed episodes in patients with bipolar I disorder: a 3-week placebo-controlled study. *J Psychopharmacol.* 2006;20(4):536-546. doi:10.1177/0269881106059693a
  26. Sachs GS, Greenberg WM, Starace A, et al. Cariprazine in the treatment of acute mania in bipolar I disorder: a double-blind, placebo-controlled, phase III trial. *J Affect Disord.* 2015;174:296-302. doi:10.1016/j.jad.2014.11.018
  27. Shafti SS. Olanzapine vs. lithium in management of acute mania. *J Affect Disord.* 2010;122(3):273-276. doi:10.1016/j.jad.2009.08.013
  28. Shafti SS. Aripiprazole Versus Lithium in Management of Acute Mania: a Randomized



Clinical Trial. *East Asian Arch Psychiatry*. 2018;28(3):80-84.

29. Smulevich AB, Khanna S, Eerdekens M, Karcher K, Kramer M, Grossman F. Acute and continuation risperidone monotherapy in bipolar mania: a 3-week placebo-controlled trial followed by a 9-week double-blind trial of risperidone and haloperidol. *Eur Neuropsychopharmacol*. 2005;15(1):75-84. doi:10.1016/j.euroneuro.2004.06.003
30. Tohen M, Sanger TM, McElroy SL, et al. Olanzapine versus placebo in the treatment of acute mania. Olanzapine HGEH Study Group. *Am J Psychiatry*. 1999;156(5):702-709. doi:10.1176/ajp.156.5.702
31. Tohen M, Jacobs TG, Grundy SL, et al. Efficacy of olanzapine in acute bipolar mania: a double-blind, placebo-controlled study. The Olanzapine HGGW Study Group [published correction appears in *Arch Gen Psychiatry* 2002 Jan;59(1):91]. *Arch Gen Psychiatry*. 2000;57(9):841-849. doi:10.1001/archpsyc.57.9.841
32. Tohen M, Baker RW, Altshuler LL, et al. Olanzapine versus divalproex in the treatment of acute mania [published correction appears in *Am J Psychiatry*. 2005 Feb;7(1):102]. *Am J Psychiatry*. 2002;159(6):1011-1017. doi:10.1176/appi.ajp.159.6.1011
33. Tohen M, Goldberg JF, Gonzalez-Pinto Arrillaga AM, et al. A 12-week, double-blind comparison of olanzapine vs haloperidol in the treatment of acute mania. *Arch Gen Psychiatry*. 2003;60(12):1218-1226. doi:10.1001/archpsyc.60.12.1218
34. Tohen M, Vieta E, Goodwin GM, et al. Olanzapine versus divalproex versus placebo in the treatment of mild to moderate mania: a randomized, 12-week, double-blind study. *J Clin Psychiatry*. 2008;69(11):1776-1789. doi:10.4088/jcp.v69n1113
35. Vieta E, Bourin M, Sanchez R, et al. Effectiveness of aripiprazole v. haloperidol in acute bipolar mania: double-blind, randomised, comparative 12-week trial. *Br J Psychiatry*. 2005;187:235-242. doi:10.1192/bjp.187.3.235
36. Vieta E, Nuamah IF, Lim P, et al. A randomized, placebo- and active-controlled study of paliperidone extended release for the treatment of acute manic and mixed episodes of bipolar I disorder. *Bipolar Disord*. 2010;12(3):230-243. doi:10.1111/j.1399-5618.2010.00815.x
37. Vieta E, Ramey T, Keller D, English PA, Loebel AD, Miceli J. Ziprasidone in the treatment of acute mania: a 12-week, placebo-controlled, haloperidol-referenced study. *J Psychopharmacol*. 2010;24(4):547-558. doi:10.1177/0269881108099418

38. Vieta, E., Sachs, G., Chang, D., Hellsten, J., Brewer, C., Peters-Strickland, T., & Hefting, N. (2021). Two randomized, double-blind, placebo-controlled trials and one open-label, long-term trial of brexpiprazole for the acute treatment of bipolar mania. *Journal of psychopharmacology* (Oxford, England), 35(8), 971–982.  
<https://doi.org/10.1177/0269881120985102>
39. Xu L, Lu Y, Yang Y, Zheng Y, Chen F, Lin Z. Olanzapine-valproate combination versus olanzapine or valproate monotherapy in the treatment of bipolar I mania: a randomized controlled study in a Chinese population group. *Neuropsychiatr Dis Treat*. 2015;11:1265-1271. Published 2015 May 25. doi:10.2147/NDT.S81146
40. Young AH, Oren DA, Lowy A, et al. Aripiprazole monotherapy in acute mania: 12-week randomised placebo- and haloperidol-controlled study. *Br J Psychiatry*. 2009;194(1):40-48. doi:10.1192/bjp.bp.108.049965
41. Zajecka JM, Weisler R, Sachs G, Swann AC, Wozniak P, Sommerville KW. A comparison of the efficacy, safety, and tolerability of divalproex sodium and olanzapine in the treatment of bipolar disorder. *J Clin Psychiatry*. 2002;63(12):1148-1155.  
doi:10.4088/jcp.v63n1210

**eTable 2.** Quantifying heterogeneity

| Between study variance: $\tau^2$ | Assessment of heterogeneity by $\tau^2$ |
|----------------------------------|-----------------------------------------|
| 0.02                             | Low to moderate heterogeneity           |

As we anticipated considerable between-study heterogeneity, a random-effects model was used to pool effect sizes. The restricted maximum likelihood estimator (Viechtbauer, 2005) was used to calculate the heterogeneity variance. We inferred the magnitude of heterogeneity by comparing the estimated  $\tau^2$  to empirical distributions of heterogeneity typically found in meta-analyses. The predictive  $\tau^2$  distribution for mental health outcomes has a median of 0.049 and an IQR of 0.01 to 0.242 (Rhodes et al., 2016). Low heterogeneity could be considered when the estimated  $\tau^2$  is less than the 25% quantile of the empirical distribution, moderate heterogeneity for  $\tau^2$  between 25% and 50% quantile, and high heterogeneity for  $\tau^2$  larger than the 50% quantile.

**Reference**

Viechtbauer, W. (2005). Bias and efficiency of meta-analytic variance estimators in the random-effects model. *Journal of Educational and Behavioral Statistics*, 30(3), 261-293.

Rhodes, K. M., Turner, R. M., & Higgins, J. P. (2016). Empirical evidence about inconsistency among studies in a pair-wise meta-analysis. *Research Synthesis Methods*, 7(4), 346-370.



**eTable 3.** Global inconsistency test (incoherence between direct and indirect estimates)

| Random-effects design-by-treatment interaction model |         |
|------------------------------------------------------|---------|
| Q                                                    | P-value |
| 49.923                                               | 0.002   |

We evaluated global consistency under the assumption of a full design-by-treatment interaction model, using the *decompose.design* function in R packagenetmeta.

**eTable 4.** Local inconsistency test (note-splitting method)

| Arm 1                | Arm 2                | k | I2    | Direct estimate      | Indirect estimate    | Network meta-analysis | Incoherence |
|----------------------|----------------------|---|-------|----------------------|----------------------|-----------------------|-------------|
| Asenapine            | Aripiprazole         | 0 | .     | .                    | 0.11 (-0.16; 0.37)   | 0.11 (-0.16; 0.37)    | .           |
| Brexiprazole         | Aripiprazole         | 0 | .     | .                    | 0.38 ( 0.09; 0.67)   | 0.38 ( 0.09; 0.67)    | .           |
| Cariprazine          | Aripiprazole         | 0 | .     | .                    | -0.03 (-0.28; 0.22)  | -0.03 (-0.28; 0.22)   | .           |
| Haloperidol          | Aripiprazole         | 2 | 50.0% | 0.02 (-0.23; 0.27)   | -0.25 (-0.48; -0.02) | -0.12 (-0.29; 0.05)   | 0.1171      |
| Haloperidol+Lithium  | Aripiprazole         | 0 | .     | .                    | 0.00 (-1.10; 1.10)   | 0.00 (-1.10; 1.10)    | .           |
| Lithium              | Aripiprazole         | 2 | 88.7% | -0.14 (-0.47; 0.19)  | 0.13 (-0.14; 0.41)   | 0.02 (-0.19; 0.23)    | 0.2112      |
| Olanzapine           | Aripiprazole         | 0 | .     | .                    | 0.02 (-0.16; 0.20)   | 0.02 (-0.16; 0.20)    | .           |
| Olanzapine+Valproate | Aripiprazole         | 0 | .     | .                    | -1.08 (-1.60; -0.57) | -1.08 (-1.60; -0.57)  | .           |
| Paliperidone         | Aripiprazole         | 0 | .     | .                    | -0.13 (-0.47; 0.22)  | -0.13 (-0.47; 0.22)   | .           |
| Placebo              | Aripiprazole         | 5 | 0.0%  | 0.39 ( 0.23; 0.55)   | 0.71 ( 0.42; 0.99)   | 0.47 ( 0.33; 0.61)    | 0.0574      |
| Quetiapine           | Aripiprazole         | 0 | .     | .                    | 0.06 (-0.15; 0.27)   | 0.06 (-0.15; 0.27)    | .           |
| Quetiapine+Lithium   | Aripiprazole         | 0 | .     | .                    | -0.24 (-0.64; 0.17)  | -0.24 (-0.64; 0.17)   | .           |
| Risperidone          | Aripiprazole         | 1 | .     | 0.31 (-0.26; 0.89)   | -0.28 (-0.50; -0.05) | -0.20 (-0.41; 0.01)   | 0.0613      |
| Valproate            | Aripiprazole         | 0 | .     | .                    | 0.41 ( 0.16; 0.67)   | 0.41 ( 0.16; 0.67)    | .           |
| Ziprasidone          | Aripiprazole         | 0 | .     | .                    | 0.13 (-0.12; 0.38)   | 0.13 (-0.12; 0.38)    | .           |
| Asenapine            | Brexiprazole         | 0 | .     | .                    | -0.28 (-0.61; 0.06)  | -0.28 (-0.61; 0.06)   | .           |
| Asenapine            | Cariprazine          | 0 | .     | .                    | 0.14 (-0.17; 0.44)   | 0.14 (-0.17; 0.44)    | .           |
| Asenapine            | Haloperidol          | 0 | .     | .                    | 0.23 (-0.03; 0.49)   | 0.23 (-0.03; 0.49)    | .           |
| Asenapine            | Haloperidol+Lithium  | 0 | .     | .                    | 0.10 (-1.01; 1.22)   | 0.10 (-1.01; 1.22)    | .           |
| Asenapine            | Lithium              | 0 | .     | .                    | 0.09 (-0.20; 0.37)   | 0.09 (-0.20; 0.37)    | .           |
| Asenapine            | Olanzapine           | 2 | 0.0%  | 0.12 (-0.13; 0.36)   | -0.08 (-0.64; 0.47)  | 0.09 (-0.14; 0.31)    | 0.5221      |
| Asenapine            | Olanzapine+Valproate | 0 | .     | .                    | 1.19 ( 0.66; 1.72)   | 1.19 ( 0.66; 1.72)    | .           |
| Asenapine            | Paliperidone         | 0 | .     | .                    | 0.23 (-0.16; 0.62)   | 0.23 (-0.16; 0.62)    | .           |
| Asenapine            | Placebo              | 2 | 37.3% | -0.40 (-0.67; -0.14) | -0.23 (-0.69; 0.23)  | -0.36 (-0.59; -0.13)  | 0.5285      |

|                |                      |   |       |                      |                      |                      |   |
|----------------|----------------------|---|-------|----------------------|----------------------|----------------------|---|
| Asenapine      | Quetiapine           | 0 | .     | .                    | 0.05 (-0.23; 0.33)   | 0.05 (-0.23; 0.33)   | . |
| Asenapine      | Quetiapine+Lithium   | 0 | .     | .                    | 0.34 (-0.10; 0.79)   | 0.34 (-0.10; 0.79)   | . |
| Asenapine      | Risperidone          | 0 | .     | .                    | 0.30 ( 0.03; 0.58)   | 0.30 ( 0.03; 0.58)   | . |
| Asenapine      | Valproate            | 0 | .     | .                    | -0.31 (-0.60; -0.02) | -0.31 (-0.60; -0.02) | . |
| Asenapine      | Ziprasidone          | 0 | .     | .                    | -0.02 (-0.33; 0.29)  | -0.02 (-0.33; 0.29)  | . |
| Brexipiprazole | Cariprazine          | 0 | .     | .                    | 0.41 ( 0.09; 0.74)   | 0.41 ( 0.09; 0.74)   | . |
| Brexipiprazole | Haloperidol          | 0 | .     | .                    | 0.50 ( 0.22; 0.79)   | 0.50 ( 0.22; 0.79)   | . |
| Brexipiprazole | Haloperidol+Lithium  | 0 | .     | .                    | 0.38 (-0.74; 1.50)   | 0.38 (-0.74; 1.50)   | . |
| Brexipiprazole | Lithium              | 0 | .     | .                    | 0.36 ( 0.05; 0.67)   | 0.36 ( 0.05; 0.67)   | . |
| Brexipiprazole | Olanzapine           | 0 | .     | .                    | 0.36 ( 0.08; 0.64)   | 0.36 ( 0.08; 0.64)   | . |
| Brexipiprazole | Olanzapine+Valproate | 0 | .     | .                    | 1.46 ( 0.91; 2.02)   | 1.46 ( 0.91; 2.02)   | . |
| Brexipiprazole | Paliperidone         | 0 | .     | .                    | 0.51 ( 0.11; 0.92)   | 0.51 ( 0.11; 0.92)   | . |
| Brexipiprazole | Placebo              | 2 | 49.1% | -0.09 (-0.34; 0.16)  | .                    | -0.09 (-0.34; 0.16)  | . |
| Brexipiprazole | Quetiapine           | 0 | .     | .                    | 0.32 ( 0.02; 0.62)   | 0.32 ( 0.02; 0.62)   | . |
| Brexipiprazole | Quetiapine+Lithium   | 0 | .     | .                    | 0.62 ( 0.16; 1.08)   | 0.62 ( 0.16; 1.08)   | . |
| Brexipiprazole | Risperidone          | 0 | .     | .                    | 0.58 ( 0.27; 0.88)   | 0.58 ( 0.27; 0.88)   | . |
| Brexipiprazole | Valproate            | 0 | .     | .                    | -0.03 (-0.36; 0.30)  | -0.03 (-0.36; 0.30)  | . |
| Brexipiprazole | Ziprasidone          | 0 | .     | .                    | 0.25 (-0.08; 0.58)   | 0.25 (-0.08; 0.58)   | . |
| Cariprazine    | Haloperidol          | 0 | .     | .                    | 0.09 (-0.16; 0.34)   | 0.09 (-0.16; 0.34)   | . |
| Cariprazine    | Haloperidol+Lithium  | 0 | .     | .                    | -0.03 (-1.14; 1.08)  | -0.03 (-1.14; 1.08)  | . |
| Cariprazine    | Lithium              | 0 | .     | .                    | -0.05 (-0.33; 0.23)  | -0.05 (-0.33; 0.23)  | . |
| Cariprazine    | Olanzapine           | 0 | .     | .                    | -0.05 (-0.29; 0.19)  | -0.05 (-0.29; 0.19)  | . |
| Cariprazine    | Olanzapine+Valproate | 0 | .     | .                    | 1.05 ( 0.51; 1.59)   | 1.05 ( 0.51; 1.59)   | . |
| Cariprazine    | Paliperidone         | 0 | .     | .                    | 0.10 (-0.28; 0.48)   | 0.10 (-0.28; 0.48)   | . |
| Cariprazine    | Placebo              | 3 | 0.0%  | -0.50 (-0.70; -0.29) | .                    | -0.50 (-0.70; -0.29) | . |
| Cariprazine    | Quetiapine           | 0 | .     | .                    | -0.09 (-0.35; 0.18)  | -0.09 (-0.35; 0.18)  | . |

|                     |                      |   |       |                      |                      |                      |         |
|---------------------|----------------------|---|-------|----------------------|----------------------|----------------------|---------|
| Cariprazine         | Quetiapine+Lithium   | 0 | .     | .                    | 0.21 (-0.23; 0.64)   | 0.21 (-0.23; 0.64)   | .       |
| Cariprazine         | Risperidone          | 0 | .     | .                    | 0.17 (-0.10; 0.44)   | 0.17 (-0.10; 0.44)   | .       |
| Cariprazine         | Valproate            | 0 | .     | .                    | -0.44 (-0.74; -0.15) | -0.44 (-0.74; -0.15) | .       |
| Cariprazine         | Ziprasidone          | 0 | .     | .                    | -0.16 (-0.46; 0.14)  | -0.16 (-0.46; 0.14)  | .       |
| Haloperidol         | Haloperidol+Lithium  | 1 | .     | -0.12 (-1.21; 0.96)  | .                    | -0.12 (-1.21; 0.96)  | .       |
| Haloperidol         | Lithium              | 0 | .     | .                    | -0.14 (-0.36; 0.08)  | -0.14 (-0.36; 0.08)  | .       |
| Haloperidol         | Olanzapine           | 3 | 0.0%  | -0.20 (-0.48; 0.08)  | -0.11 (-0.32; 0.10)  | -0.14 (-0.31; 0.02)  | 0.6036  |
| Haloperidol         | Olanzapine+Valproate | 0 | .     | .                    | 0.96 ( 0.45; 1.47)   | 0.96 ( 0.45; 1.47)   | .       |
| Haloperidol         | Paliperidone         | 0 | .     | .                    | 0.01 (-0.34; 0.35)   | 0.01 (-0.34; 0.35)   | .       |
| Haloperidol         | Placebo              | 5 | 57.2% | -0.59 (-0.77; -0.41) | -0.59 (-0.81; -0.36) | -0.59 (-0.73; -0.45) | 0.9985  |
| Haloperidol         | Quetiapine           | 1 | .     | -0.25 (-0.65; 0.14)  | -0.15 (-0.39; 0.08)  | -0.18 (-0.38; 0.02)  | 0.6661  |
| Haloperidol         | Quetiapine+Lithium   | 0 | .     | .                    | 0.11 (-0.29; 0.52)   | 0.11 (-0.29; 0.52)   | .       |
| Haloperidol         | Risperidone          | 1 | .     | 0.13 (-0.23; 0.49)   | 0.05 (-0.20; 0.29)   | 0.07 (-0.13; 0.28)   | 0.6929  |
| Haloperidol         | Valproate            | 0 | .     | .                    | -0.54 (-0.78; -0.29) | -0.54 (-0.78; -0.29) | .       |
| Haloperidol         | Ziprasidone          | 1 | .     | -0.52 (-0.87; -0.17) | -0.04 (-0.35; 0.27)  | -0.25 (-0.49; -0.02) | 0.0467* |
| Haloperidol+Lithium | Lithium              | 0 | .     | .                    | -0.02 (-1.12; 1.09)  | -0.02 (-1.12; 1.09)  | .       |
| Haloperidol+Lithium | Olanzapine           | 0 | .     | .                    | -0.02 (-1.12; 1.08)  | -0.02 (-1.12; 1.08)  | .       |
| Haloperidol+Lithium | Olanzapine+Valproate | 0 | .     | .                    | 1.08 (-0.12; 2.28)   | 1.08 (-0.12; 2.28)   | .       |
| Haloperidol+Lithium | Paliperidone         | 0 | .     | .                    | 0.13 (-1.01; 1.27)   | 0.13 (-1.01; 1.27)   | .       |
| Haloperidol+Lithium | Placebo              | 0 | .     | .                    | -0.47 (-1.56; 0.63)  | -0.47 (-1.56; 0.63)  | .       |
| Haloperidol+Lithium | Quetiapine           | 0 | .     | .                    | -0.06 (-1.16; 1.05)  | -0.06 (-1.16; 1.05)  | .       |
| Haloperidol+Lithium | Quetiapine+Lithium   | 0 | .     | .                    | 0.24 (-0.92; 1.40)   | 0.24 (-0.92; 1.40)   | .       |
| Haloperidol+Lithium | Risperidone          | 0 | .     | .                    | 0.20 (-0.91; 1.30)   | 0.20 (-0.91; 1.30)   | .       |
| Haloperidol+Lithium | Valproate            | 0 | .     | .                    | -0.41 (-1.52; 0.70)  | -0.41 (-1.52; 0.70)  | .       |
| Haloperidol+Lithium | Ziprasidone          | 0 | .     | .                    | -0.13 (-1.24; 0.98)  | -0.13 (-1.24; 0.98)  | .       |
| Lithium             | Olanzapine           | 2 | 93.5% | -0.00 (-0.37; 0.37)  | -0.00 (-0.25; 0.25)  | -0.00 (-0.21; 0.20)  | 0.9961  |

|                      |                      |   |       |                      |                      |                      |           |
|----------------------|----------------------|---|-------|----------------------|----------------------|----------------------|-----------|
| Lithium              | Olanzapine+Valproate | 0 | .     | .                    | 1.10 ( 0.58; 1.63)   | 1.10 ( 0.58; 1.63)   | .         |
| Lithium              | Paliperidone         | 0 | .     | .                    | 0.15 (-0.21; 0.50)   | 0.15 (-0.21; 0.50)   | .         |
| Lithium              | Placebo              | 2 | 57.2% | -0.42 (-0.68; -0.15) | -0.48 (-0.74; -0.22) | -0.45 (-0.63; -0.26) | 0.7467    |
| Lithium              | Quetiapine           | 2 | 33.2% | 0.06 (-0.22; 0.35)   | -0.16 (-0.47; 0.15)  | -0.04 (-0.25; 0.17)  | 0.3083    |
| Lithium              | Quetiapine+Lithium   | 0 | .     | .                    | 0.26 (-0.15; 0.66)   | 0.26 (-0.15; 0.66)   | .         |
| Lithium              | Risperidone          | 0 | .     | .                    | 0.22 (-0.03; 0.46)   | 0.22 (-0.03; 0.46)   | .         |
| Lithium              | Valproate            | 0 | .     | .                    | -0.40 (-0.66; -0.13) | -0.40 (-0.66; -0.13) | .         |
| Lithium              | Ziprasidone          | 0 | .     | .                    | -0.11 (-0.39; 0.17)  | -0.11 (-0.39; 0.17)  | .         |
| Olanzapine           | Olanzapine+Valproate | 1 | .     | 0.65 ( 0.12; 1.17)   | 3.80 ( 2.52; 5.08)   | 1.10 ( 0.62; 1.59)   | < 0.0001* |
| Olanzapine           | Paliperidone         | 0 | .     | .                    | 0.15 (-0.19; 0.49)   | 0.15 (-0.19; 0.49)   | .         |
| Olanzapine           | Placebo              | 6 | 0.0%  | -0.44 (-0.61; -0.28) | -0.45 (-0.67; -0.23) | -0.45 (-0.58; -0.32) | 0.9666    |
| Olanzapine           | Quetiapine           | 0 | .     | .                    | -0.04 (-0.24; 0.16)  | -0.04 (-0.24; 0.16)  | .         |
| Olanzapine           | Quetiapine+Lithium   | 0 | .     | .                    | 0.26 (-0.14; 0.66)   | 0.26 (-0.14; 0.66)   | .         |
| Olanzapine           | Risperidone          | 1 | .     | 0.32 (-0.04; 0.67)   | 0.17 (-0.06; 0.41)   | 0.22 ( 0.02; 0.41)   | 0.5035    |
| Olanzapine           | Valproate            | 4 | 90.0% | -0.41 (-0.62; -0.21) | -0.25 (-0.80; 0.31)  | -0.39 (-0.59; -0.20) | 0.5790    |
| Olanzapine           | Ziprasidone          | 0 | .     | .                    | -0.11 (-0.35; 0.14)  | -0.11 (-0.35; 0.14)  | .         |
| Olanzapine+Valproate | Paliperidone         | 0 | .     | .                    | -0.95 (-1.55; -0.36) | -0.95 (-1.55; -0.36) | .         |
| Olanzapine+Valproate | Placebo              | 0 | .     | .                    | -1.55 (-2.05; -1.05) | -1.55 (-2.05; -1.05) | .         |
| Olanzapine+Valproate | Quetiapine           | 0 | .     | .                    | -1.14 (-1.66; -0.62) | -1.14 (-1.66; -0.62) | .         |
| Olanzapine+Valproate | Quetiapine+Lithium   | 0 | .     | .                    | -0.85 (-1.47; -0.22) | -0.85 (-1.47; -0.22) | .         |
| Olanzapine+Valproate | Risperidone          | 0 | .     | .                    | -0.89 (-1.41; -0.37) | -0.89 (-1.41; -0.37) | .         |
| Olanzapine+Valproate | Valproate            | 1 | .     | -2.23 (-2.82; -1.64) | 0.23 (-0.68; 1.14)   | -1.50 (-1.99; -1.00) | < 0.0001* |
| Olanzapine+Valproate | Ziprasidone          | 0 | .     | .                    | -1.21 (-1.76; -0.67) | -1.21 (-1.76; -0.67) | .         |
| Paliperidone         | Placebo              | 1 | .     | -0.63 (-1.00; -0.26) | -0.49 (-1.12; 0.14)  | -0.60 (-0.91; -0.28) | 0.7116    |
| Paliperidone         | Quetiapine           | 1 | .     | -0.16 (-0.50; 0.18)  | -0.32 (-1.08; 0.44)  | -0.19 (-0.50; 0.13)  | 0.7116    |
| Paliperidone         | Quetiapine+Lithium   | 0 | .     | .                    | 0.11 (-0.36; 0.58)   | 0.11 (-0.36; 0.58)   | .         |

|                    |                    |   |      |                    |                      |                      |         |
|--------------------|--------------------|---|------|--------------------|----------------------|----------------------|---------|
| Paliperidone       | Risperidone        | 0 | .    | .                  | 0.07 (-0.29; 0.43)   | 0.07 (-0.29; 0.43)   | .       |
| Paliperidone       | Valproate          | 0 | .    | .                  | -0.54 (-0.92; -0.16) | -0.54 (-0.92; -0.16) | .       |
| Paliperidone       | Ziprasidone        | 0 | .    | .                  | -0.26 (-0.64; 0.12)  | -0.26 (-0.64; 0.12)  | .       |
| Placebo            | Quetiapine         | 4 | 0.0% | 0.41 ( 0.22; 0.59) | 0.42 ( 0.06; 0.78)   | 0.41 ( 0.24; 0.58)   | 0.9641  |
| Placebo            | Quetiapine+Lithium | 0 | .    | .                  | 0.70 ( 0.32; 1.09)   | 0.70 ( 0.32; 1.09)   | .       |
| Placebo            | Risperidone        | 3 | 0.0% | 0.68 ( 0.47; 0.89) | 0.63 ( 0.34; 0.93)   | 0.66 ( 0.49; 0.84)   | 0.7984  |
| Placebo            | Valproate          | 1 | .    | 0.09 (-0.27; 0.46) | 0.03 (-0.23; 0.30)   | 0.05 (-0.16; 0.27)   | 0.7920  |
| Placebo            | Ziprasidone        | 3 | 0.0% | 0.43 ( 0.20; 0.66) | -0.28 (-0.88; 0.31)  | 0.34 ( 0.12; 0.55)   | 0.0291* |
| Quetiapine         | Quetiapine+Lithium | 1 | .    | 0.30 (-0.05; 0.64) | .                    | 0.30 (-0.05; 0.64)   | .       |
| Quetiapine         | Risperidone        | 0 | .    | .                  | 0.25 ( 0.02; 0.49)   | 0.25 ( 0.02; 0.49)   | .       |
| Quetiapine         | Valproate          | 1 | .    | 0.22 (-0.58; 1.01) | -0.42 (-0.70; -0.15) | -0.36 (-0.62; -0.10) | 0.1363  |
| Quetiapine         | Ziprasidone        | 0 | .    | .                  | -0.07 (-0.34; 0.20)  | -0.07 (-0.34; 0.20)  | .       |
| Quetiapine+Lithium | Risperidone        | 0 | .    | .                  | -0.04 (-0.46; 0.38)  | -0.04 (-0.46; 0.38)  | .       |
| Quetiapine+Lithium | Valproate          | 0 | .    | .                  | -0.65 (-1.09; -0.22) | -0.65 (-1.09; -0.22) | .       |
| Quetiapine+Lithium | Ziprasidone        | 0 | .    | .                  | -0.37 (-0.81; 0.07)  | -0.37 (-0.81; 0.07)  | .       |
| Risperidone        | Valproate          | 0 | .    | .                  | -0.61 (-0.87; -0.35) | -0.61 (-0.87; -0.35) | .       |
| Risperidone        | Ziprasidone        | 0 | .    | .                  | -0.33 (-0.60; -0.06) | -0.33 (-0.60; -0.06) | .       |
| Valproate          | Ziprasidone        | 0 | .    | .                  | 0.28 (-0.02; 0.58)   | 0.28 (-0.02; 0.58)   | .       |



eTable 5. CINeMA appraisal

| Comparison               | Number of studies | Within-study bias | Reporting bias | Indirectness | Imprecision    | Heterogeneity  | Incoherence    | Confidence rating |
|--------------------------|-------------------|-------------------|----------------|--------------|----------------|----------------|----------------|-------------------|
| Aripiprazole:Haloperidol | 2                 | Some concerns     | Some concerns  | No concerns  | Major concerns | No concerns    | No concerns    | Very low          |
| Aripiprazole:Lithium     | 2                 | Some concerns     | Some concerns  | No concerns  | Major concerns | No concerns    | No concerns    | Very low          |
| Aripiprazole:Placebo     | 5                 | Some concerns     | Some concerns  | No concerns  | No concerns    | No concerns    | No concerns    | Moderate          |
| Aripiprazole:Risperidone | 1                 | Some concerns     | Some concerns  | No concerns  | Major concerns | No concerns    | Major concerns | Very low          |
| Asenapine:Olanzapine     | 2                 | Some concerns     | Some concerns  | No concerns  | Major concerns | No concerns    | No concerns    | Very low          |
| Asenapine:Placebo        | 2                 | Some concerns     | Some concerns  | No concerns  | No concerns    | Major concerns | No concerns    | Low               |
| Brexipiprazole:Placebo   | 2                 | Some concerns     | Some concerns  | No concerns  | Major concerns | No concerns    | Major concerns | Very low          |
| Cariprazine:Placebo      | 3                 | Some concerns     | Some concerns  | No concerns  | No concerns    | No concerns    | Major concerns | Very low          |
| Haloperidol:Olanzapine   | 3                 | Some concerns     | Some concerns  | No concerns  | Major concerns | No concerns    | No concerns    | Very low          |
| Haloperidol:Placebo      | 5                 | Some concerns     | Some concerns  | No concerns  | No concerns    | No concerns    | No concerns    | Moderate          |
| Haloperidol:Quetiapine   | 1                 | Some concerns     | Some concerns  | No concerns  | Major concerns | No concerns    | No concerns    | Very low          |
| Haloperidol:Risperidone  | 1                 | Some concerns     | Some concerns  | No concerns  | Major concerns | No concerns    | No concerns    | Very low          |
| Haloperidol:Ziprasidone  | 1                 | Some concerns     | Some concerns  | No concerns  | Major concerns | No concerns    | Major concerns | Very low          |
| Lithium:Olanzapine       | 2                 | Some concerns     | Some concerns  | No concerns  | Major concerns | No concerns    | No concerns    | Very low          |
| Lithium:Placebo          | 2                 | Some concerns     | Some concerns  | No concerns  | No concerns    | No concerns    | No concerns    | Moderate          |
| Lithium:Quetiapine       | 2                 | Some concerns     | Some concerns  | No concerns  | Major concerns | No concerns    | No concerns    | Very low          |
| Olanzapine:Placebo       | 6                 | Some concerns     | Some concerns  | No concerns  | No concerns    | No concerns    | No concerns    | Moderate          |
| Olanzapine:Risperidone   | 1                 | Some concerns     | Some concerns  | No concerns  | No concerns    | Major concerns | No concerns    | Very low          |
| Olanzapine:Valproate     | 4                 | Some concerns     | Some concerns  | No concerns  | No concerns    | No concerns    | No concerns    | Moderate          |
| Paliperidone:Placebo     | 1                 | Some concerns     | Some concerns  | No concerns  | No concerns    | No concerns    | No concerns    | Moderate          |
| Paliperidone:Quetiapine  | 1                 | Some concerns     | Some concerns  | No concerns  | Major concerns | No concerns    | No concerns    | Very low          |

|                           |   |               |               |             |                |                |                |          |
|---------------------------|---|---------------|---------------|-------------|----------------|----------------|----------------|----------|
| Placebo:Quetiapine        | 4 | Some concerns | Some concerns | No concerns | No concerns    | No concerns    | No concerns    | Moderate |
| Placebo:Risperidone       | 3 | Some concerns | Some concerns | No concerns | No concerns    | No concerns    | No concerns    | Moderate |
| Placebo:Valproate         | 1 | Some concerns | Some concerns | No concerns | Major concerns | No concerns    | No concerns    | Very low |
| Placebo:Ziprasidone       | 3 | Some concerns | Some concerns | No concerns | No concerns    | Major concerns | Major concerns | Very low |
| Quetiapine:Valproate      | 1 | Some concerns | Some concerns | No concerns | No concerns    | Major concerns | No concerns    | Very low |
| Aripiprazole:Asenapine    | 0 | Some concerns | Some concerns | No concerns | Major concerns | No concerns    | Major concerns | Very low |
| Aripiprazole:Brexiprazole | 0 | Some concerns | Some concerns | No concerns | No concerns    | Major concerns | Major concerns | Very low |
| Aripiprazole:Cariprazine  | 0 | Some concerns | Some concerns | No concerns | Major concerns | No concerns    | Major concerns | Very low |
| Aripiprazole:Olanzapine   | 0 | Some concerns | Some concerns | No concerns | Major concerns | No concerns    | Major concerns | Very low |
| Aripiprazole:Paliperidone | 0 | Some concerns | Some concerns | No concerns | Major concerns | No concerns    | Major concerns | Very low |
| Aripiprazole:Quetiapine   | 0 | Some concerns | Some concerns | No concerns | Major concerns | No concerns    | Major concerns | Very low |
| Aripiprazole:Valproate    | 0 | Some concerns | Some concerns | No concerns | No concerns    | Major concerns | Major concerns | Very low |
| Aripiprazole:Ziprasidone  | 0 | Some concerns | Some concerns | No concerns | Major concerns | No concerns    | Major concerns | Very low |
| Asenapine:Brexiprazole    | 0 | Some concerns | Some concerns | No concerns | Major concerns | No concerns    | Major concerns | Very low |
| Asenapine:Cariprazine     | 0 | Some concerns | Some concerns | No concerns | Major concerns | No concerns    | Major concerns | Very low |
| Asenapine:Haloperidol     | 0 | Some concerns | Some concerns | No concerns | Major concerns | No concerns    | Major concerns | Very low |
| Asenapine:Lithium         | 0 | Some concerns | Some concerns | No concerns | Major concerns | No concerns    | Major concerns | Very low |
| Asenapine:Paliperidone    | 0 | Some concerns | Some concerns | No concerns | Major concerns | No concerns    | Major concerns | Very low |
| Asenapine:Quetiapine      | 0 | Some concerns | Some concerns | No concerns | Major concerns | No concerns    | Major concerns | Very low |
| Asenapine:Risperidone     | 0 | Some concerns | Some concerns | No concerns | Major concerns | No concerns    | Major concerns | Very low |
| Asenapine:Valproate       | 0 | Some concerns | Some concerns | No concerns | Major concerns | No concerns    | Major concerns | Very low |
| Asenapine:Ziprasidone     | 0 | Some concerns | Some concerns | No concerns | Major concerns | No concerns    | Major concerns | Very low |
| Brexiprazole:Cariprazine  | 0 | Some concerns | Some concerns | No concerns | No concerns    | Major concerns | Major concerns | Very low |

|                            |   |               |               |             |                |                |                |          |
|----------------------------|---|---------------|---------------|-------------|----------------|----------------|----------------|----------|
| Brexpiprazole:Haloperidol  | 0 | Some concerns | Some concerns | No concerns | No concerns    | No concerns    | Major concerns | Very low |
| Brexpiprazole:Lithium      | 0 | Some concerns | Some concerns | No concerns | No concerns    | Major concerns | Major concerns | Very low |
| Brexpiprazole:Olanzapine   | 0 | Some concerns | Some concerns | No concerns | No concerns    | Major concerns | Major concerns | Very low |
| Brexpiprazole:Paliperidone | 0 | Some concerns | Some concerns | No concerns | No concerns    | Major concerns | Major concerns | Very low |
| Brexpiprazole:Quetiapine   | 0 | Some concerns | Some concerns | No concerns | Major concerns | No concerns    | Major concerns | Very low |
| Brexpiprazole:Risperidone  | 0 | Some concerns | Some concerns | No concerns | No concerns    | No concerns    | Major concerns | Very low |
| Brexpiprazole:Valproate    | 0 | Some concerns | Some concerns | No concerns | Major concerns | No concerns    | Major concerns | Very low |
| Brexpiprazole:Ziprasidone  | 0 | Some concerns | Some concerns | No concerns | Major concerns | No concerns    | Major concerns | Very low |
| Cariprazine:Haloperidol    | 0 | Some concerns | Some concerns | No concerns | Major concerns | No concerns    | Major concerns | Very low |
| Cariprazine:Lithium        | 0 | Some concerns | Some concerns | No concerns | Major concerns | No concerns    | Major concerns | Very low |
| Cariprazine:Olanzapine     | 0 | Some concerns | Some concerns | No concerns | Major concerns | No concerns    | Major concerns | Very low |
| Cariprazine:Paliperidone   | 0 | Some concerns | Some concerns | No concerns | Major concerns | No concerns    | Major concerns | Very low |
| Cariprazine:Quetiapine     | 0 | Some concerns | Some concerns | No concerns | Major concerns | No concerns    | Major concerns | Very low |
| Cariprazine:Risperidone    | 0 | Some concerns | Some concerns | No concerns | Major concerns | No concerns    | Major concerns | Very low |
| Cariprazine:Valproate      | 0 | Some concerns | Some concerns | No concerns | No concerns    | Major concerns | Major concerns | Very low |
| Cariprazine:Ziprasidone    | 0 | Some concerns | Some concerns | No concerns | Major concerns | No concerns    | Major concerns | Very low |
| Haloperidol:Lithium        | 0 | Some concerns | Some concerns | No concerns | Major concerns | No concerns    | Major concerns | Very low |
| Haloperidol:Paliperidone   | 0 | Some concerns | Some concerns | No concerns | Major concerns | No concerns    | Major concerns | Very low |
| Haloperidol:Valproate      | 0 | Some concerns | Some concerns | No concerns | No concerns    | No concerns    | Major concerns | Very low |
| Lithium:Paliperidone       | 0 | Some concerns | Some concerns | No concerns | Major concerns | No concerns    | Major concerns | Very low |
| Lithium:Risperidone        | 0 | Some concerns | Some concerns | No concerns | Major concerns | No concerns    | Major concerns | Very low |
| Lithium:Valproate          | 0 | Some concerns | Some concerns | No concerns | No concerns    | Major concerns | Major concerns | Very low |
| Lithium:Ziprasidone        | 0 | Some concerns | Some concerns | No concerns | Major concerns | No concerns    | Major concerns | Very low |

|                          |   |               |               |             |                |                |                |          |
|--------------------------|---|---------------|---------------|-------------|----------------|----------------|----------------|----------|
| Olanzapine:Paliperidone  | 0 | Some concerns | Some concerns | No concerns | Major concerns | No concerns    | Major concerns | Very low |
| Olanzapine:Quetiapine    | 0 | Some concerns | Some concerns | No concerns | Major concerns | No concerns    | Major concerns | Very low |
| Olanzapine:Ziprasidone   | 0 | Some concerns | Some concerns | No concerns | Major concerns | No concerns    | Major concerns | Very low |
| Paliperidone:Risperidone | 0 | Some concerns | Some concerns | No concerns | Major concerns | No concerns    | Major concerns | Very low |
| Paliperidone:Valproate   | 0 | Some concerns | Some concerns | No concerns | No concerns    | No concerns    | Major concerns | Very low |
| Paliperidone:Ziprasidone | 0 | Some concerns | Some concerns | No concerns | Major concerns | No concerns    | Major concerns | Very low |
| Quetiapine:Risperidone   | 0 | Some concerns | Some concerns | No concerns | Major concerns | No concerns    | Major concerns | Very low |
| Quetiapine:Ziprasidone   | 0 | Some concerns | Some concerns | No concerns | Major concerns | No concerns    | Major concerns | Very low |
| Risperidone:Valproate    | 0 | Some concerns | Some concerns | No concerns | No concerns    | No concerns    | Major concerns | Very low |
| Risperidone:Ziprasidone  | 0 | Some concerns | Some concerns | No concerns | No concerns    | Major concerns | Major concerns | Very low |
| Valproate:Ziprasidone    | 0 | Some concerns | Some concerns | No concerns | Major concerns | No concerns    | Major concerns | Very low |

**eTable 6.** Direct ratio analyses for dose equivalents to olanzapine 1 mg

| Drug         | Group         | n    | Dose | Upper | Lower | t     | P-value | Change(%) | Certainty <sup>a</sup> |
|--------------|---------------|------|------|-------|-------|-------|---------|-----------|------------------------|
| Haloperidol* | Mania         | 590  | 0.47 | 0.49  | 0.45  | 70.73 | <0.001  | -47.2%    | Moderate               |
|              | Schizophrenia | 1953 | 0.89 | 0.89  | 0.89  |       |         |           |                        |
| Risperidone* | Mania         | 668  | 0.27 | 0.28  | 0.26  | 0     | >0.999  | 0.0%      | Moderate               |
|              | Schizophrenia | 1623 | 0.27 | 0.27  | 0.27  |       |         |           |                        |
| Asenapine    | Mania         | 770  | 1.15 | 1.16  | 1.14  |       |         | 16.2%     | High                   |
|              | Schizophrenia | 913  | 0.99 | na    |       |       |         |           |                        |

<sup>a</sup>The certainty of evidence was according to the results of GRADE appraisal (eTable 7, eTable 8, and eTable 13).

**eTable 7.** GRADE for haloperidol dose equivalent to olanzapine 1 mg

| Initial level of certainty                                                                                                          | Downgrading or upgrading |                                                                                                                                                                     | Final level of certainty                                                                                                         |
|-------------------------------------------------------------------------------------------------------------------------------------|--------------------------|---------------------------------------------------------------------------------------------------------------------------------------------------------------------|----------------------------------------------------------------------------------------------------------------------------------|
| <b>High level of certainty</b><br>All the included studies of haloperidol and olanzapine were blinded randomized controlled trials. | <b>Risk of bias</b>      | All studies including haloperidol and olanzapine did not have high risk of bias, except for the study by Garfinkel et al (1980; haloperidol) had high risk of bias. | Weight mean dose: <b>Low</b><br><br>Direct ratio analyses: <b>Low</b><br><br>Direct and indirect ratio analyses: <b>Very low</b> |
|                                                                                                                                     | <b>Inconsistency</b>     | In meta-analysis of mean dose, the I <sup>2</sup> was 99.9% for haloperidol, and 98.5% for olanzapine.                                                              |                                                                                                                                  |
|                                                                                                                                     | <b>Indirectness</b>      | No serious indirectness for weight mean dose method and direct ratio analysis. Indirectness should be considered in direct and indirect ratio analysis.             |                                                                                                                                  |
|                                                                                                                                     | <b>Imprecision</b>       | Not serious. Narrow 95% confidence intervals with the point estimate for both haloperidol and olanzapine.                                                           |                                                                                                                                  |
|                                                                                                                                     | <b>Publications</b>      | Not serious. Egger’s test (P value) was 0.26 for all included studies.                                                                                              |                                                                                                                                  |



**eTable 8.** GRADE for risperidone dose equivalent to olanzapine 1 mg

| Initial level of certainty                                                                                                          | Downgrading or upgrading |                                                                                                                                                         | Final level of certainty                                                                                                              |
|-------------------------------------------------------------------------------------------------------------------------------------|--------------------------|---------------------------------------------------------------------------------------------------------------------------------------------------------|---------------------------------------------------------------------------------------------------------------------------------------|
| <b>High level of certainty</b><br>All the included studies of risperidone and olanzapine were blinded randomized controlled trials. | <b>Risk of bias</b>      | All studies including risperidone and olanzapine did not have high risk of bias.                                                                        | Weight mean dose: <b>Moderate</b><br><br>Direct ratio analyses: <b>Moderate</b><br><br>Direct and indirect ratio analyses: <b>Low</b> |
|                                                                                                                                     | <b>Inconsistency</b>     | In meta-analysis of mean dose, the I <sup>2</sup> was 98.8% for risperidone, and 98.5% for olanzapine.                                                  |                                                                                                                                       |
|                                                                                                                                     | <b>Indirectness</b>      | No serious indirectness for weight mean dose method and direct ratio analysis. Indirectness should be considered in direct and indirect ratio analysis. |                                                                                                                                       |
|                                                                                                                                     | <b>Imprecision</b>       | Not serious. Narrow 95% confidence intervals with the point estimate for both risperidone and olanzapine.                                               |                                                                                                                                       |
|                                                                                                                                     | <b>Publications</b>      | Not serious. Egger’s test (P value) was 0.26 for all included studies.                                                                                  |                                                                                                                                       |

**eTable 9.** GRADE for paliperidone dose equivalent to olanzapine 1 mg

| Initial level of certainty                                                                                                           | Downgrading or upgrading |                                                                                                                  | Final level of certainty          |
|--------------------------------------------------------------------------------------------------------------------------------------|--------------------------|------------------------------------------------------------------------------------------------------------------|-----------------------------------|
| <b>High level of certainty</b><br>All the included studies of paliperidone and olanzapine were blinded randomized controlled trials. | <b>Risk of bias</b>      | All studies including paliperidone and olanzapine did not have high risk of bias.                                | Weight mean dose: <b>Moderate</b> |
|                                                                                                                                      | <b>Inconsistency</b>     | In meta-analysis of mean dose, the $I^2$ was 98.5% for olanzapine, and there was only one study on paliperidone. |                                   |
|                                                                                                                                      | <b>Indirectness</b>      | No serious indirectness for weight mean dose method.                                                             |                                   |
|                                                                                                                                      | <b>Imprecision</b>       | Not serious. Narrow 95% confidence intervals with the point estimate for both paliperidone and olanzapine.       |                                   |
|                                                                                                                                      | <b>Publications</b>      | Not serious. Egger's test (P value) was 0.26 for all included studies.                                           |                                   |

**eTable 10.** GRADE for ziprasidone dose equivalent to olanzapine 1 mg

| Initial level of certainty                                                                                                          | Downgrading or upgrading |                                                                                                                                  | Final level of certainty                                                                |
|-------------------------------------------------------------------------------------------------------------------------------------|--------------------------|----------------------------------------------------------------------------------------------------------------------------------|-----------------------------------------------------------------------------------------|
| <b>High level of certainty</b><br>All the included studies of ziprasidone and olanzapine were blinded randomized controlled trials. | <b>Risk of bias</b>      | All studies including ziprasidone and olanzapine did not have high risk of bias.                                                 | Weight mean dose: <b>Moderate</b><br><br>Direct and indirect ratio analyses: <b>Low</b> |
|                                                                                                                                     | <b>Inconsistency</b>     | In meta-analysis of mean dose, the $I^2$ was 93.9% for ziprasidone, and 98.5% for olanzapine.                                    |                                                                                         |
|                                                                                                                                     | <b>Indirectness</b>      | No serious indirectness for weight mean dose method.<br>Indirectness should be considered in direct and indirect ratio analysis. |                                                                                         |
|                                                                                                                                     | <b>Imprecision</b>       | Not serious. Narrow 95% confidence intervals with the point estimate for both ziprasidone and olanzapine.                        |                                                                                         |
|                                                                                                                                     | <b>Publications</b>      | Not serious. Egger's test (P value) was 0.26 for all included studies.                                                           |                                                                                         |

**eTable 11.** GRADE for quetiapine dose equivalent to olanzapine 1 mg

| Initial level of certainty                                                                                                         | Downgrading or upgrading |                                                                                                          | Final level of certainty          |
|------------------------------------------------------------------------------------------------------------------------------------|--------------------------|----------------------------------------------------------------------------------------------------------|-----------------------------------|
| <b>High level of certainty</b><br>All the included studies of quetiapine and olanzapine were blinded randomized controlled trials. | <b>Risk of bias</b>      | All studies including quetiapine and olanzapine did not have high risk of bias.                          | Weight mean dose: <b>Moderate</b> |
|                                                                                                                                    | <b>Inconsistency</b>     | In meta-analysis of mean dose, the $I^2$ was 95.0% for quetiapine, and 98.5% for olanzapine.             |                                   |
|                                                                                                                                    | <b>Indirectness</b>      | No serious indirectness for weight mean dose method.                                                     |                                   |
|                                                                                                                                    | <b>Imprecision</b>       | Not serious. Narrow 95% confidence intervals with the point estimate for both quetiapine and olanzapine. |                                   |
|                                                                                                                                    | <b>Publications</b>      | Not serious. Egger's test (P value) was 0.26 for all included studies.                                   |                                   |

**eTable 12.** GRADE for aripiprazole dose equivalent to olanzapine 1 mg

| Initial level of certainty                                                                                                           | Downgrading or upgrading |                                                                                                                                  | Final level of certainty                                                                |
|--------------------------------------------------------------------------------------------------------------------------------------|--------------------------|----------------------------------------------------------------------------------------------------------------------------------|-----------------------------------------------------------------------------------------|
| <b>High level of certainty</b><br>All the included studies of aripiprazole and olanzapine were blinded randomized controlled trials. | <b>Risk of bias</b>      | All studies including aripiprazole and olanzapine did not have high risk of bias.                                                | Weight mean dose: <b>Moderate</b><br><br>Direct and indirect ratio analyses: <b>Low</b> |
|                                                                                                                                      | <b>Inconsistency</b>     | In meta-analysis of mean dose, the I <sup>2</sup> was 96.5% for aripiprazole, and 98.5% for olanzapine.                          |                                                                                         |
|                                                                                                                                      | <b>Indirectness</b>      | No serious indirectness for weight mean dose method.<br>Indirectness should be considered in direct and indirect ratio analysis. |                                                                                         |
|                                                                                                                                      | <b>Imprecision</b>       | Not serious. Narrow 95% confidence intervals with the point estimate for both aripiprazole and olanzapine.                       |                                                                                         |
|                                                                                                                                      | <b>Publications</b>      | Not serious. Egger’s test (P value) was 0.26 for all included studies.                                                           |                                                                                         |

**eTable 13.** GRADE for asenapine dose equivalent to olanzapine 1 mg

| Initial level of certainty                                                                                                        | Downgrading or upgrading |                                                                                                                                                         | Final level of certainty                                                                                                              |
|-----------------------------------------------------------------------------------------------------------------------------------|--------------------------|---------------------------------------------------------------------------------------------------------------------------------------------------------|---------------------------------------------------------------------------------------------------------------------------------------|
| <b>High level of certainty</b><br>All the included studies of asenapine and olanzapine were blinded randomized controlled trials. | <b>Risk of bias</b>      | All studies including asenapine and olanzapine did not have high risk of bias.                                                                          | Weight mean dose: <b>Moderate</b><br><br>Direct ratio analyses: <b>Moderate</b><br><br>Direct and indirect ratio analyses: <b>Low</b> |
|                                                                                                                                   | <b>Inconsistency</b>     | In meta-analysis of mean dose, the I <sup>2</sup> was 0.0% for asenapine, and 98.5% for olanzapine.                                                     |                                                                                                                                       |
|                                                                                                                                   | <b>Indirectness</b>      | No serious indirectness for weight mean dose method and direct ratio analysis. Indirectness should be considered in direct and indirect ratio analysis. |                                                                                                                                       |
|                                                                                                                                   | <b>Imprecision</b>       | Not serious. Narrow 95% confidence intervals with the point estimate for both asenapine and olanzapine.                                                 |                                                                                                                                       |
|                                                                                                                                   | <b>Publications</b>      | Not serious. Egger’s test (P value) was 0.26 for all included studies.                                                                                  |                                                                                                                                       |



**eTable 14.** GRADE for cariprazine dose equivalent to olanzapine 1 mg

| Initial level of certainty                                                                                                          | Downgrading or upgrading |                                                                                                           | Final level of certainty          |
|-------------------------------------------------------------------------------------------------------------------------------------|--------------------------|-----------------------------------------------------------------------------------------------------------|-----------------------------------|
| <b>High level of certainty</b><br>All the included studies of cariprazine and olanzapine were blinded randomized controlled trials. | <b>Risk of bias</b>      | All studies including cariprazine and olanzapine did not have high risk of bias.                          | Weight mean dose: <b>Moderate</b> |
|                                                                                                                                     | <b>Inconsistency</b>     | In meta-analysis of mean dose, the I <sup>2</sup> was 98.1% for cariprazine, and 98.5% for olanzapine.    |                                   |
|                                                                                                                                     | <b>Indirectness</b>      | No serious indirectness for weight mean doe.                                                              |                                   |
|                                                                                                                                     | <b>Imprecision</b>       | Not serious. Narrow 95% confidence intervals with the point estimate for both cariprazine and olanzapine. |                                   |
|                                                                                                                                     | <b>Publications</b>      | Not serious. Egger’s test (P value) was 0.26 for all included studies.                                    |                                   |

**eTable 15.** GRADE for brexpiprazole dose equivalent to olanzapine 1 mg

| Initial level of certainty                                                                                                            | Downgrading or upgrading |                                                                                                                                                                                                                                                                                                    | Final level of certainty     |
|---------------------------------------------------------------------------------------------------------------------------------------|--------------------------|----------------------------------------------------------------------------------------------------------------------------------------------------------------------------------------------------------------------------------------------------------------------------------------------------|------------------------------|
| <b>High level of certainty</b><br>All the included studies of brexpiprazole and olanzapine were blinded randomized controlled trials. | <b>Risk of bias</b>      | All studies including brexpiprazole and olanzapine did not have high risk of bias.                                                                                                                                                                                                                 | Weight mean dose: <b>Low</b> |
|                                                                                                                                       | <b>Inconsistency</b>     | In meta-analysis of mean dose, the I <sup>2</sup> was 0.0% for brexpiprazole, and 98.5% for olanzapine.                                                                                                                                                                                            |                              |
|                                                                                                                                       | <b>Indirectness</b>      | No serious indirectness for weight mean dose method.                                                                                                                                                                                                                                               |                              |
|                                                                                                                                       | <b>Imprecision</b>       | Not serious. Narrow 95% confidence intervals with the point estimate for both brexpiprazole and olanzapine. However, we downgraded the level of certainty, because brexpiprazole did not statistically differ from placebo in the efficacy of antimanic outcome assessed by network meta-analysis. |                              |
|                                                                                                                                       | <b>Publications</b>      | Not serious. Egger’s test (P value) was 0.26 for all included studies.                                                                                                                                                                                                                             |                              |
